# Supplementary material for: Chiral expression in conjugated helical block copolymers
Source: Royal Society of Chemistry journal article supplement (doi:10.1039/c8py01490f), 2019-01-01
Supplement: c8py01490f1.pdf [file c8py01490f1.pdf]

## Supporting Information

# Chiral Expression in Conjugated Helical Block Copolymers

*Pieter Leysen, Stien Vertommen, Guy Koeckelberghs\**

Laboratory for Polymer Synthesis, Department of Chemistry, KU Leuven,  
Celestijnenlaan 200F, B-3001 Heverlee, BELGIUM

## Contents

|                                 |    |
|---------------------------------|----|
| Experimental Information .....  | 3  |
| Synthesis of the monomers.....  | 3  |
| Synthesis of the polymers ..... | 6  |
| GPC-Chromatograms .....         | 9  |
| UV-Vis and CD-spectra .....     | 16 |
| NMR spectra.....                | 20 |
| References.....                 | 41 |

## Experimental Information

All reagents were purchased from TCI, Sigma-Aldrich, J&K Scientific and Acros Organics and used without further purification. 2,2,6,6-Tetramethylpiperidylmagnesium chloride lithium chloride complex was titrated before use according to the procedure by Love *et al.*<sup>1</sup> Reagent grade solvents were dried by a solvent purification system MBRAUN SPS 800 (columns with activated alumina). <sup>1</sup>H NMR spectra were recorded on a Bruker Avance 300 MHz spectrometer. <sup>13</sup>C-NMR-spectra were measured on a Bruker Avance 600 MHz-spectrometer. Size exclusion chromatography (SEC) measurements were carried out on a Shimadzu 20A GPC system. The column is a PLgel 5 μm mixed-D type column, and the detection system consists of a differential refractometer and a UV-vis spectrophotometer. The GPC system is calibrated toward polystyrene standards (purchased from Polymer Laboratories). Before measuring, the polymers are dissolved in THF (c ≈ 1 mg/mL) and filtered over a pore size of 0.2 μm. UV-vis measurements were performed on a Varian 400 Scan. CD-measurements were performed on a Jasco J-1500. Compounds **5**<sup>2</sup>, **2R**<sup>3</sup>, **4B**<sup>4</sup>, **6S**<sup>5</sup> and **7**<sup>6</sup> were prepared according to literature procedures.

## Synthesis of the monomers

### Synthesis of compound **3R**.

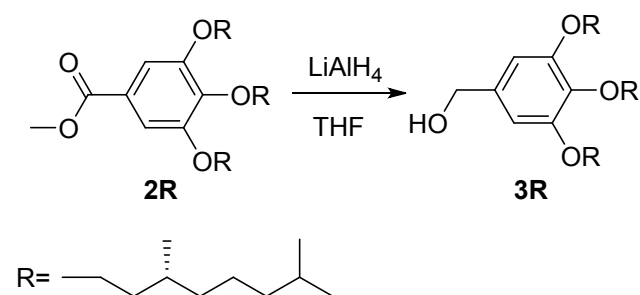

**2R** (24.0 mmol, 14.6 g) was brought under N<sub>2</sub>-atmosphere and dissolved in dry THF (100 ml). It was then added dropwise to an ice-cooled suspension of LiAlH<sub>4</sub> (38.4 mmol, 1.46 g) in

THF (16 ml). After complete addition, the ice bath was removed and the mixture was heated at reflux and monitored via TLC (SiO<sub>2</sub>, DCM/EtOAc 8/2) until complete conversion (3 hours). The mixture is then cooled to 0°C and added to ice, after which a 2M HCl-solution is added. The product is extracted with diethyl ether and the combined organic layers are dried over MgSO<sub>4</sub>. The solvent is removed under reduced pressure and the product is isolated as a yellowish oil. Yield: 11.7 g (84%) <sup>1</sup>H-NMR (CDCl<sub>3</sub>, 300 MHz) δ (ppm) = 6.58 (s, 2H), 4.61 (d, 2H, 6.0 Hz), 3.98 (m, 6H), 1.86 (m, 3H), 1.60 (m, 9H), 1.26 (m, 19H), 0.94 (d, 9H, 6.6 Hz), 0.87 (d, 18H, 6.6 Hz) <sup>13</sup>C-NMR (CDCl<sub>3</sub>, 150 MHz) δ (ppm) = 153.4, 137.6, 136.0, 105.3, 71.7, 67.4, 65.7, 39.4, 39.3, 37.5, 37.4, 36.4, 29.8, 29.7, 28.0, 24.7, 22.7, 22.6, 22.6, 19.6, 19.6 MS (ESI) (m/z): 575.4

#### Synthesis of compound 4R.

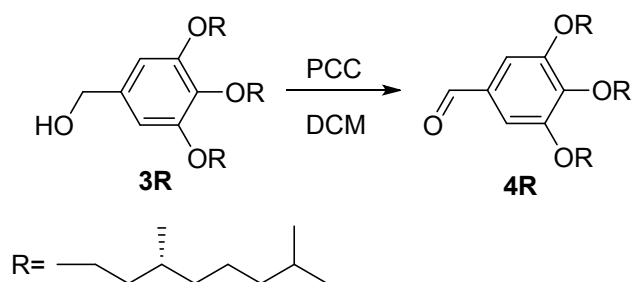

**3R** (20.3 mmol, 11.7g) was dissolved in dry DCM (80 ml) and added to pyridinium chlorochromate (PCC) (30.4 mmol, 6.55 g) in dry DCM (70 ml). The mixture was stirred at room temperature for 3 hours and filtered over silica using diethyl ether. The solvent was then removed under reduced pressure and the pure product was isolated as a yellow oil. Yield: 10.4g (89%) <sup>1</sup>H-NMR (CDCl<sub>3</sub>, 300 MHz) δ (ppm) = 9.84 (s, 1H), 7.08 (s, 2H), 4.10 (m, 6H), 1.86 (m, 3H), 1.59 (m, 9H), 1.24 (m, 18H), 0.94 (d, 9H, 6.6 Hz), 0.87 (d, 18H, 6.6 Hz) <sup>13</sup>C-NMR (CDCl<sub>3</sub>, 150 MHz) δ (ppm) = 191.4, 153.5, 143.8, 131.5, 107.8, 71.9, 67.6, 39.3, 39.2, 37.5, 37.3, 36.3, 29.9, 29.6, 28.0, 24.7, 22.7, 22.6, 19.6, 19.5 MS (ESI) (m/z): 575.4

#### Synthesis of compound 6R.

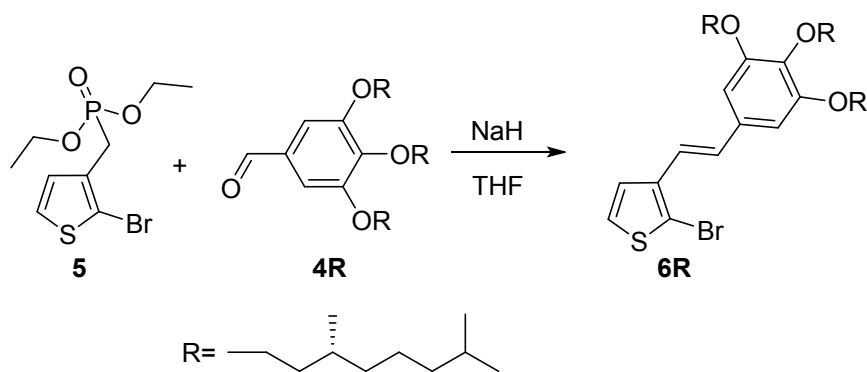

Under N<sub>2</sub>-atmosphere, NaH (5.30 mmol, 0.13 g) was suspended in dry THF (10 ml). **4R** (5.30 mmol, 3.02 g) in dry THF (5 ml) and **5** (4.80 mmol, 1.50 g) in THF (5 ml) were added respectively. The reaction mixture was heated until reflux and the reaction was monitored with TLC (SiO<sub>2</sub>, heptane/DCM 7/3). After complete conversion, the reaction mixture was added to water and a 1M HCl-solution was added. The product was extracted with DCM and the combined organic layers were washed with a NaHCO<sub>3</sub> and NaCl solution respectively. The organic layer was dried using MgSO<sub>4</sub> and the solvent was removed under reduced pressure. The crude product was purified via column chromatography (SiO<sub>2</sub>, heptane/DCM 7/3) and isolated as a yellowish oil. Yield: 1.23 g (35%) <sup>1</sup>H-NMR (CDCl<sub>3</sub>, 300 MHz) δ (ppm) = 7.25 (d, 1H, 5.9 Hz), 7.19 (d, 1H, 5.9 Hz), 6.96 (d, 1H, 16Hz), 6.88 (d, 1H, 16Hz), 6.71 (s, 2H), 4.02 (m, 6H), 1.87 (m, 3H), 1.59 (m, 9H), 1.25 (m, 18H), 0.95 (d, 9H, 6.6 Hz), 0.87 (d, 18H, 6.6 Hz) <sup>13</sup>C-NMR (CDCl<sub>3</sub>, 150 MHz) δ (ppm) = 153.4, 138.6, 138.2, 132.2, 130.9, 126.0, 124.6, 120.1, 110.9, 105.3, 71.8, 67.5, 39.4, 39.3, 37.5, 37.4, 37.4, 36.5, 29.8, 29.7, 28.0, 24.8, 24.7, 22.7, 22.6, 19.6, 19.6 MS (ESI) (m/z): 734.4

### Synthesis of compound 6B.

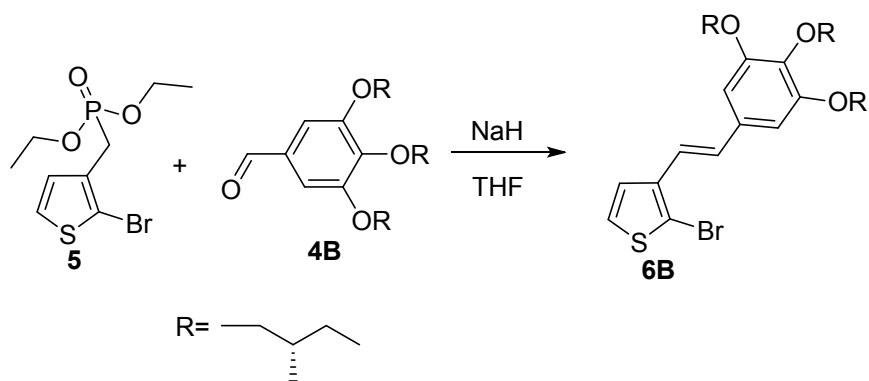

The same procedure as described for **6R** was followed, using **4B** (3.80 mmol, 1.38 g) instead of **4R**. Yield: 0.82 g (46%) <sup>1</sup>H-NMR (CDCl<sub>3</sub>, 300 MHz) δ (ppm) = 7.25 (d, 1H, 5.9 Hz), 7.18 (d, 1H, 5.9 Hz), 6.96 (d, 1H, 16 Hz), 6.88 (d, 1H, 16 Hz), 6.69 (s, 2H), 3.82 (m, 6H), 1.87 (m, 3H), 1.62 (m, 3H), 1.29 (m, 3H), 1.05 (d, 9H, 6.6 Hz), 0.96 (t, 9H, 7.4 Hz) <sup>13</sup>C-NMR (CDCl<sub>3</sub>, 150 MHz) δ (ppm) = 153.5, 138.5, 138.3, 132.2, 131.0, 126.0, 124.7, 120.0, 110.8, 104.9, 78.7, 73.9, 35.8, 34.9, 26.2, 16.7, 11.4, 11.4 MS (ESI) (m/z): 525.1

## Synthesis of the polymers

Synthesis of the block copolymers made from enantiomers **1** and **2**

The reagent quantities and reaction yields can be found in Table S 1. The quantities for the initiator are found in Table S 2.

Two flasks were charged with respectively **6S** and **6R** and purged with N<sub>2</sub>. 2,2,6,6-tetramethylpiperidinylmagnesium chloride (TMPPMgCl.LiCl) was added and the resulting mixture was stirred for three hours at room temperature. Compound **7** and 1,3-bis(diphenylphosphino)propane were added to a flask and brought under N<sub>2</sub>-atmosphere. THF (1 ml) was added and the mixture is stirred at room temperature for 15 minutes to obtain initiator **8**. After three hours, the flasks containing **6S** and **6R** were diluted with dry THF until a monomer concentration of 0.1M. The first monomer was then cannulated into the initiator flask. After 10 minutes of polymerization time, a small quantity of polymer was taken out and terminated by addition of 2M HCl in THF for GPC-analysis. The second monomer was then

added. After 35 minutes, the polymerization was terminated using a 2M HCl in THF solution. The polymer was then precipitated in methanol and purified via Soxhlet extraction using methanol and chloroform. The chloroform layer was concentrated under reduced pressure and again precipitated in methanol. The polymer was filtered on a glass sintered filter and dried under vacuum. It was isolated as a red powder.

Table S 1. Reagent quantities and yields for the monomer synthesis for polymers **P1-P6**

|           | Compound <b>6S</b> |           |                           | Compound <b>6R</b> |           |                           | Yield (mg/%) |
|-----------|--------------------|-----------|---------------------------|--------------------|-----------|---------------------------|--------------|
|           | Amount (mmol)      | Mass (mg) | TMPMgCl.LiCl (0.81M) (ml) | Amount (mmol)      | Mass (mg) | TMPMgCl.LiCl (0.81M) (ml) |              |
| <b>P1</b> | 0.30               | 220       | 0.35                      | 0                  | 0         | 0                         | 117/59%      |
| <b>P2</b> | 0.26               | 190       | 0.30                      | 0.04               | 30        | 0.05                      | 102/62%      |
| <b>P3</b> | 0.22               | 160       | 0.25                      | 0.08               | 61        | 0.09                      | 110/67%      |
| <b>P4</b> | 0.15               | 110       | 0.19                      | 0.05               | 37        | 0.06                      | 50/51%       |
| <b>P5</b> | 0.18               | 128       | 0.20                      | 0.13               | 92        | 0.15                      | 107/66%      |
| <b>P6</b> | 0.13               | 91        | 0.15                      | 0.08               | 55        | 0.09                      | 65/66%       |

Table S 2. Reagent quantities for the initiator synthesis for polymers **P1-P6**

|                       | <b>7</b>            |           | dppp                |           |
|-----------------------|---------------------|-----------|---------------------|-----------|
|                       | Amount ( $\mu$ mol) | Mass (mg) | Amount ( $\mu$ mol) | Mass (mg) |
| <b>P1, P2, P3, P5</b> | 8.3                 | 7.13      | 16.6                | 6.87      |
| <b>P4, P6</b>         | 5                   | 4.28      | 10                  | 4.12      |

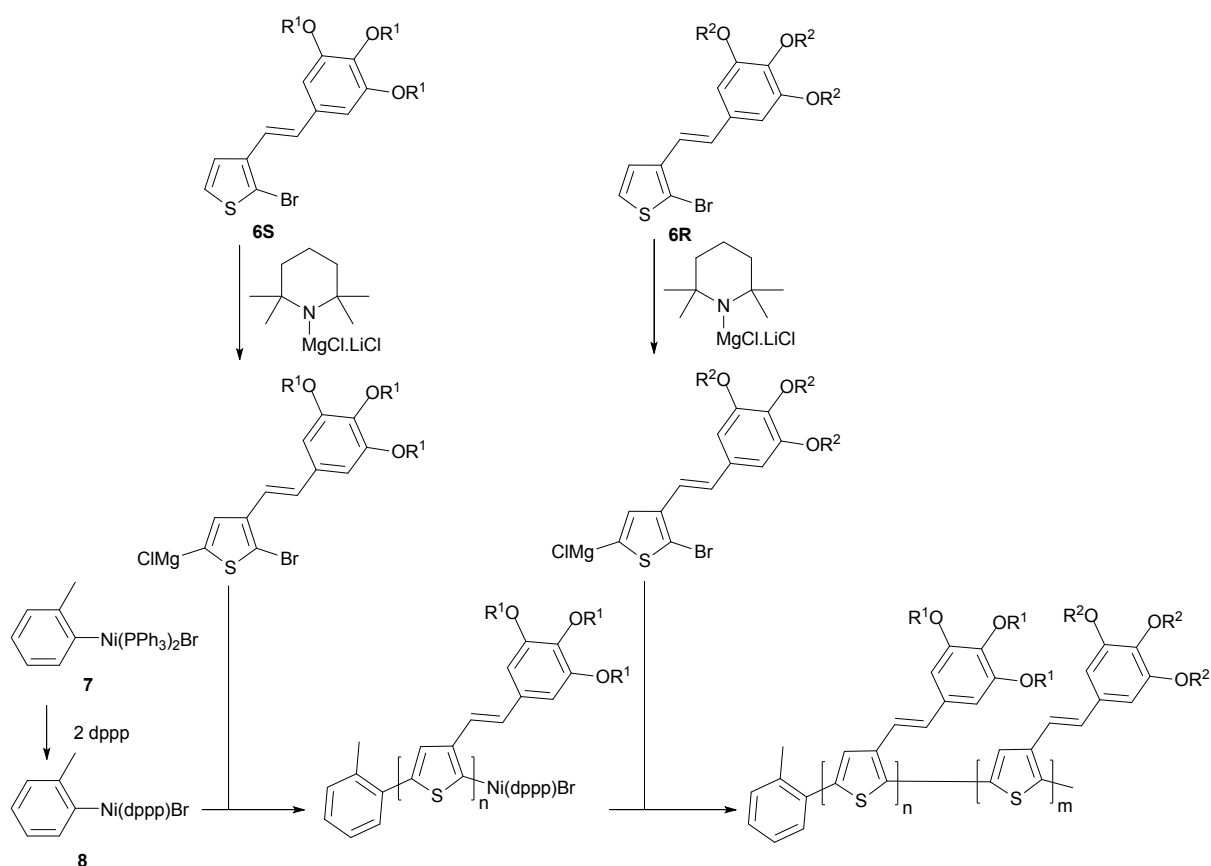

Figure S 1. Scheme for the synthesis of block copolymers **P1-P6**

Synthesis of the block copolymers made from **3** and **1**

For these polymers, the same procedure as for the first series of block copolymers was used with **6B** instead of **6S** and **6S** instead of **6R**. The used quantities and reaction yields can be found in Tables S3 and S4.

Table S 3. Reagent quantities and yields for the monomer synthesis for polymers **P7-P14**

|            | Compound <b>6B</b> |           |                           | Compound <b>6S</b> |           |                           | Yield (mg/%) |
|------------|--------------------|-----------|---------------------------|--------------------|-----------|---------------------------|--------------|
|            | Amount (mmol)      | Mass (mg) | TMPMgCl.LiCl (0.81M) (ml) | Amount (mmol)      | Mass (mg) | TMPMgCl.LiCl (0.81M) (ml) |              |
| <b>P7</b>  | 0.15               | 78        | 0.19                      | 0                  | 0         | 0                         | 36/55%       |
| <b>P8</b>  | 0.19               | 97        | 0.23                      | 0.02               | 11        | 0.02                      | 30/48%       |
| <b>P9</b>  | 0.18               | 92        | 0.21                      | 0.03               | 18        | 0.03                      | 50/66%       |
| <b>P10</b> | 0.15               | 78        | 0.19                      | 0.05               | 36        | 0.06                      | 30/38%       |
| <b>P11</b> | 0.08               | 65        | 0.15                      | 0.08               | 55        | 0.09                      | 48/59%       |
| <b>P12</b> | 0.05               | 26        | 0.06                      | 0.12               | 88        | 0.15                      | 38/38%       |
| <b>P13</b> | 0.09               | 46        | 0.11                      | 0.11               | 82        | 0.14                      | 65/66%       |
| <b>P14</b> | 0.10               | 52        | 0.12                      | 0.22               | 161       | 0.27                      | 75/40%       |

Table S 4. Reagent quantities for the initiator synthesis for polymers **P7-P14**

|  | <b>7</b> | dppp |
|--|----------|------|
|  |          |      |



|                         | Amount ( $\mu\text{mol}$ ) | Mass (mg) | Amount ( $\mu\text{mol}$ ) | Mass (mg) |
|-------------------------|----------------------------|-----------|----------------------------|-----------|
| <b>P7</b>               | 6                          | 5.13      | 12                         | 4.95      |
| <b>P8, P9, P10, P11</b> | 5                          | 4.28      | 10                         | 4.12      |
| <b>P12</b>              | 11                         | 8.2       | 22                         | 9.2       |
| <b>P13</b>              | 12                         | 10.0      | 24                         | 9.7       |
| <b>P14</b>              | 17                         | 14.2      | 33                         | 13.7      |

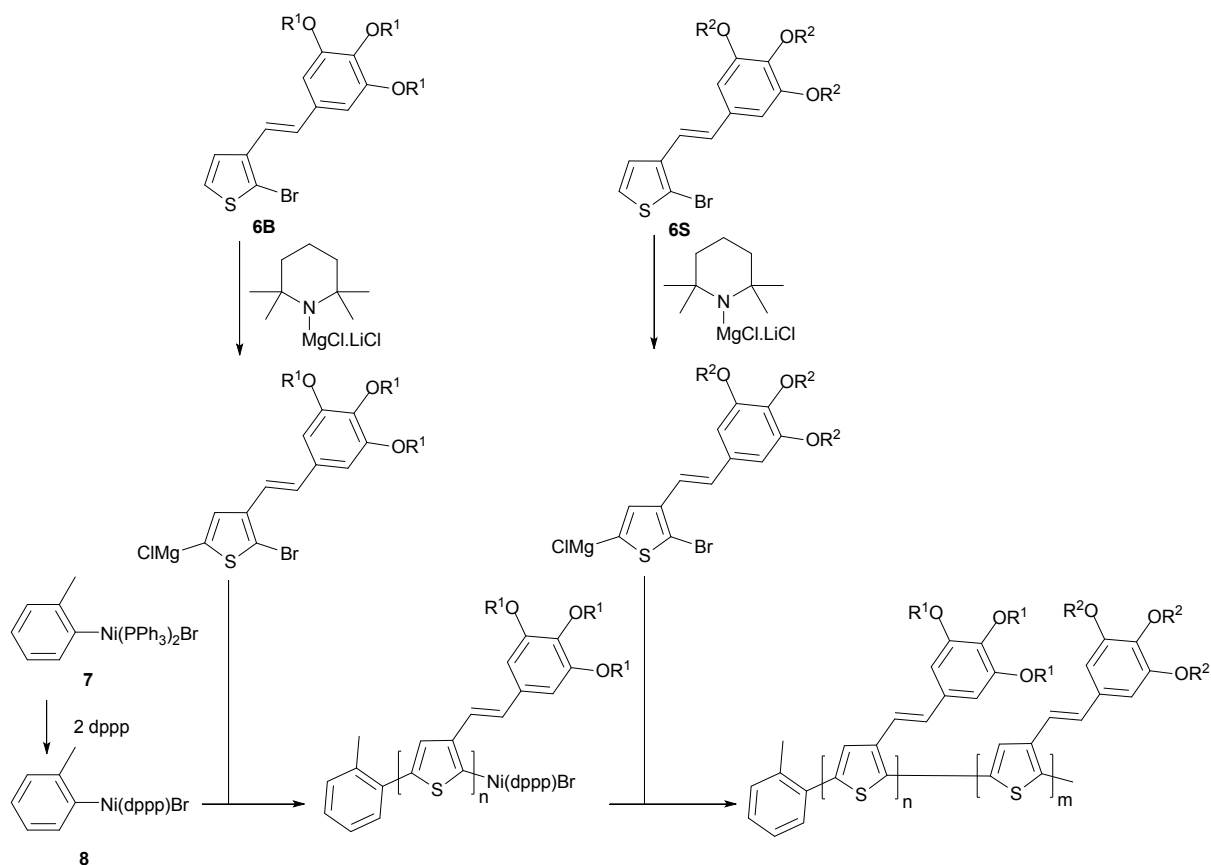

Figure S 2. Scheme for the synthesis of block copolymers **P7-P12**

## GPC-Chromatograms

GPC chromatograms were measured for both blocks of all block copolymers. The GPC of the first block is in black, GPC after addition of the second block in red. For homopolymers **P1** and **P7** only one chromatogram was measured as there was only one monomer addition. The peak at 10.5 min belongs to BHT used to stabilise THF.

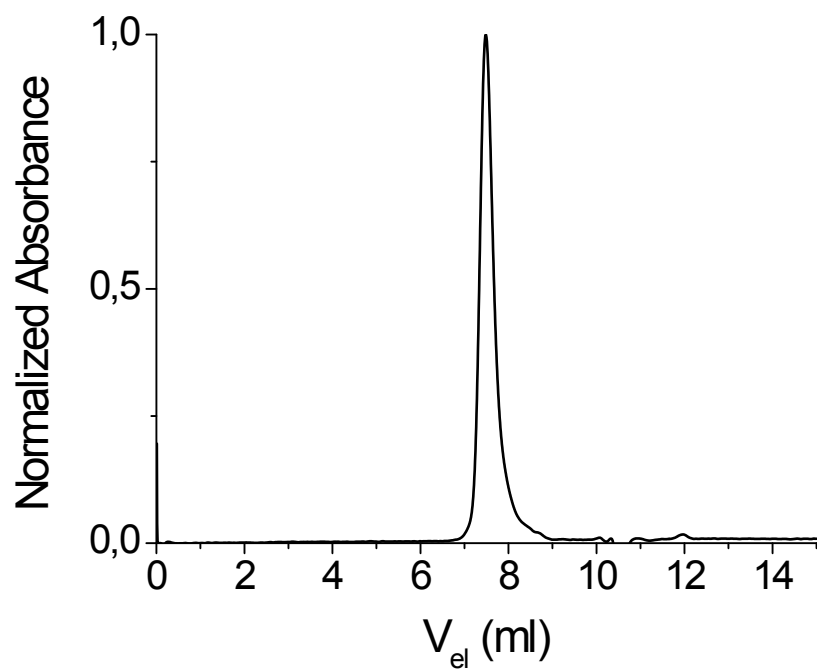

Figure S 3. GPC-chromatogram of **P1**

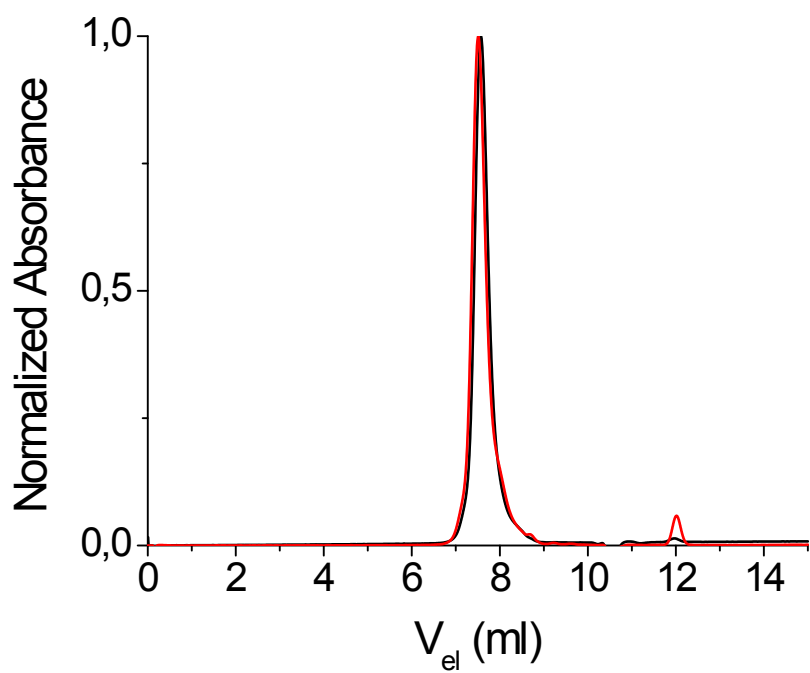

Figure S 4. GPC-chromatogram of **P2**, first block is in black, the second in red

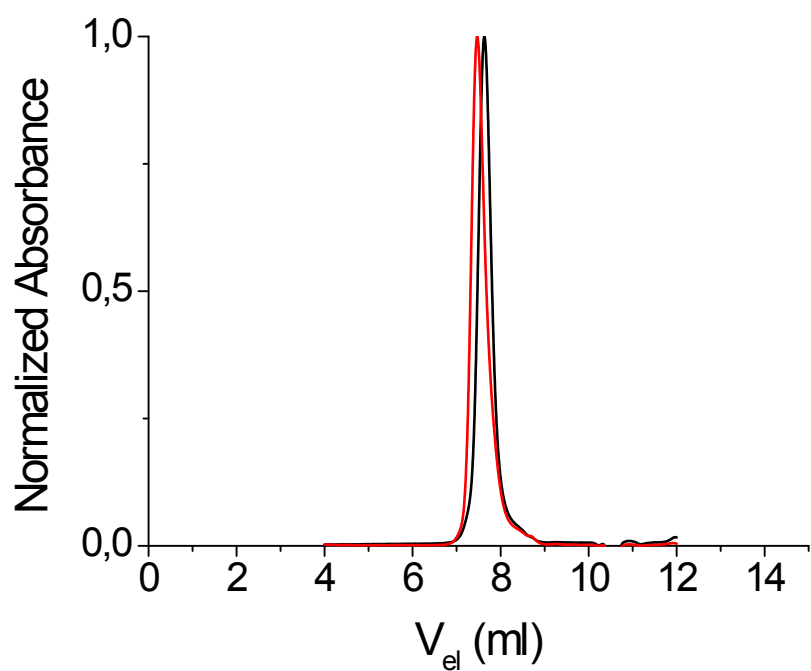

Figure S 5. GPC-chromatogram of **P3**, first block is in black, the second in red

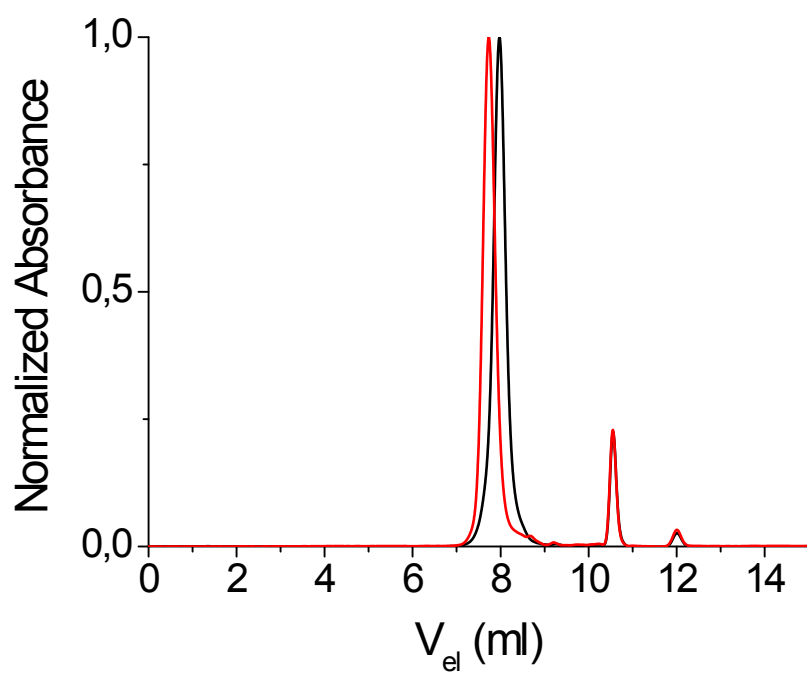

Figure S 6. GPC-chromatogram of **P4**, first block is in black, the second in red

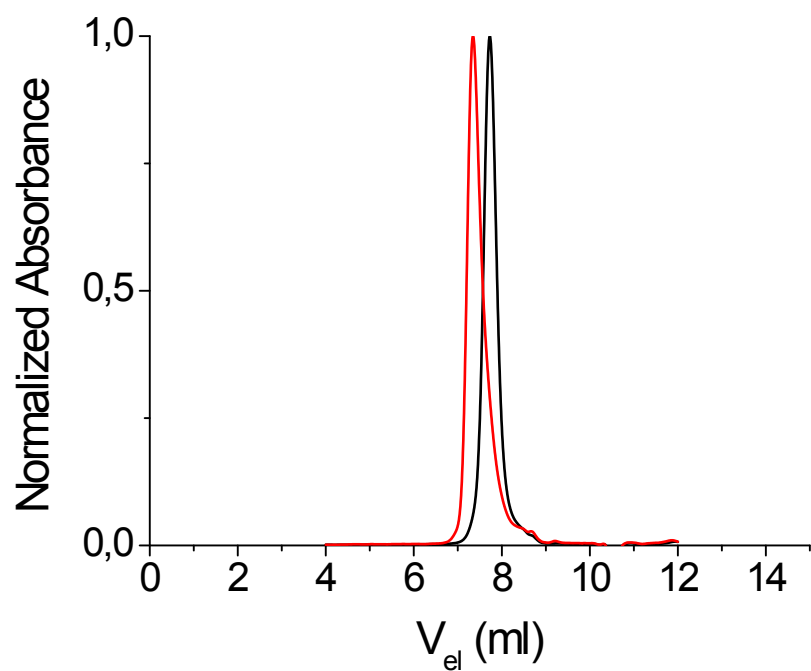

Figure S 7. GPC-chromatogram of **P5**, first block is in black, the second in red

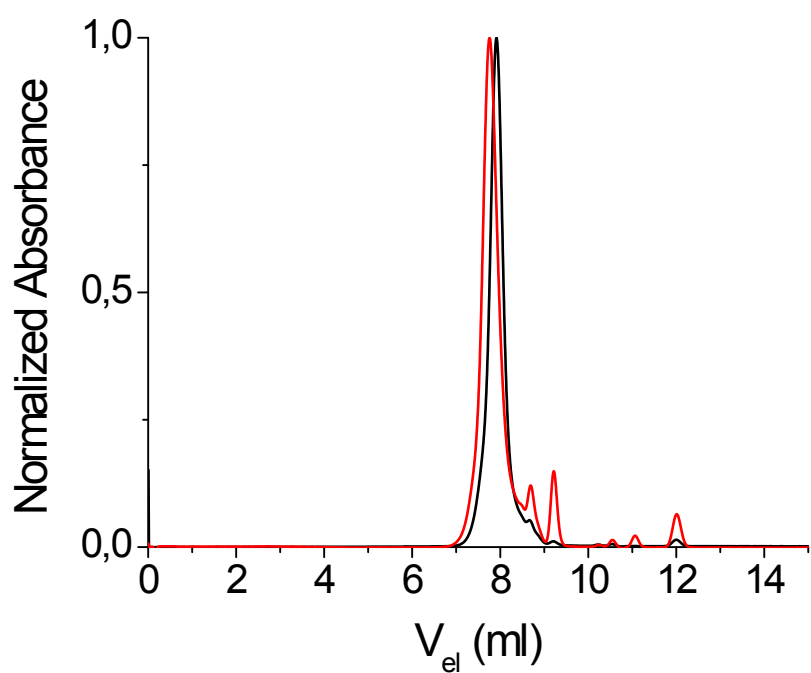

Figure S 8. GPC-chromatogram of **P6**, first block is in black, the second in red

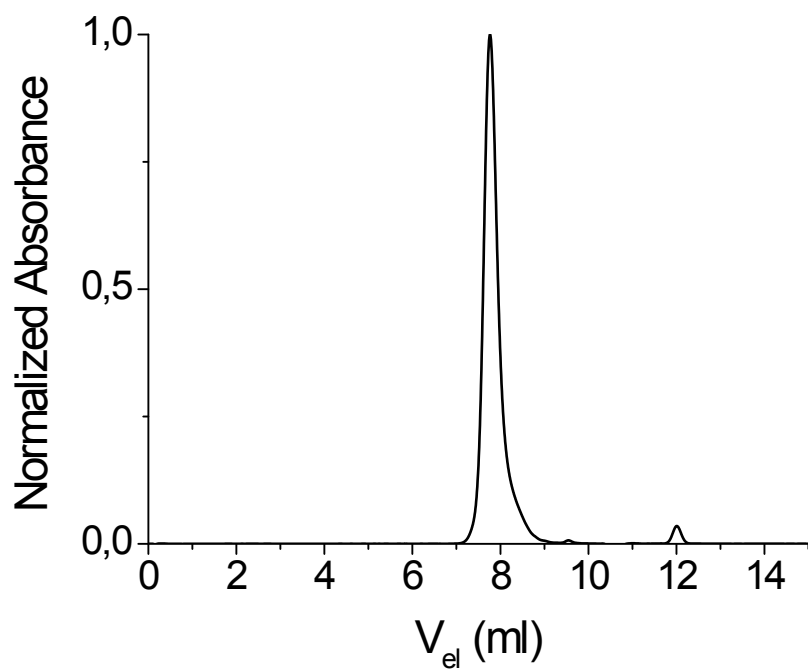

Figure S 9. GPC-chromatogram of **P7**

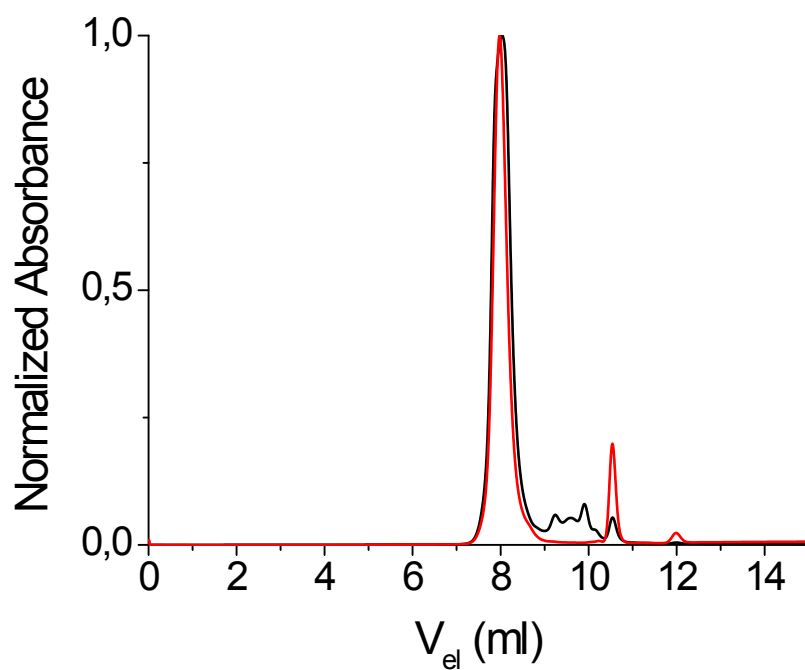

Figure S 10. GPC-chromatogram of **P8**, first block is in black, the second in red

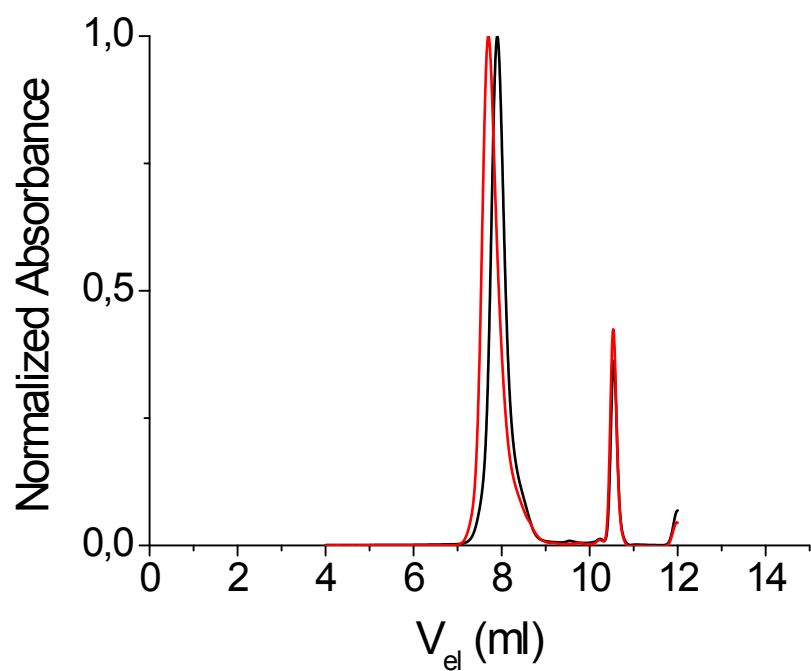

Figure S 11. GPC-chromatogram of **P9**, first block is in black, the second in red

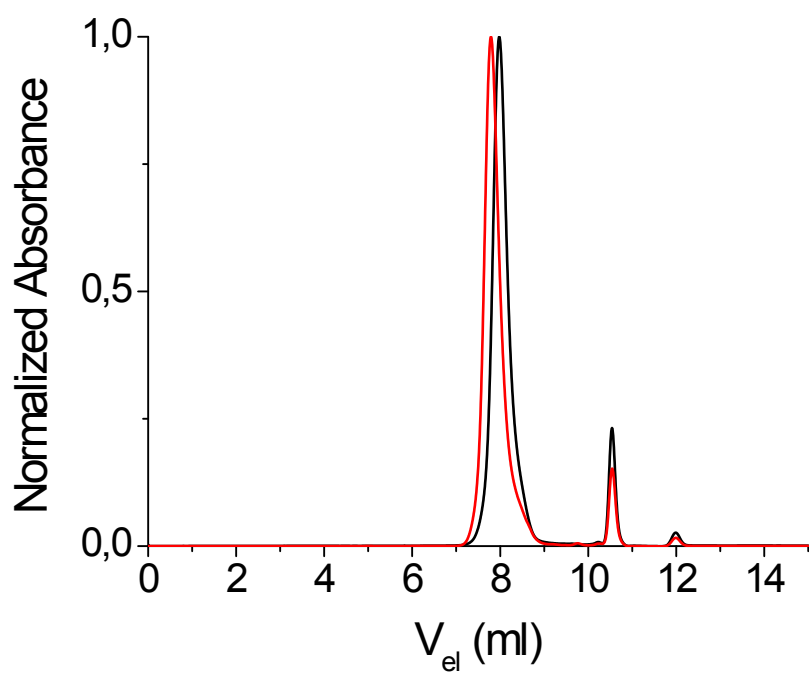

Figure S 12. GPC-chromatogram of **P10**, first block is in black, the second in red

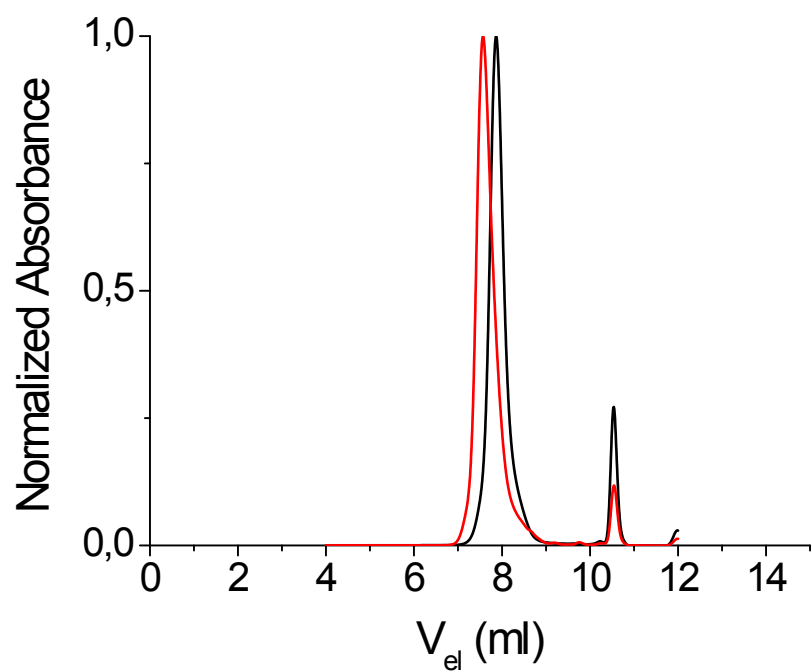

Figure S 13. GPC-chromatogram of **P11**, first block is in black, the second in red

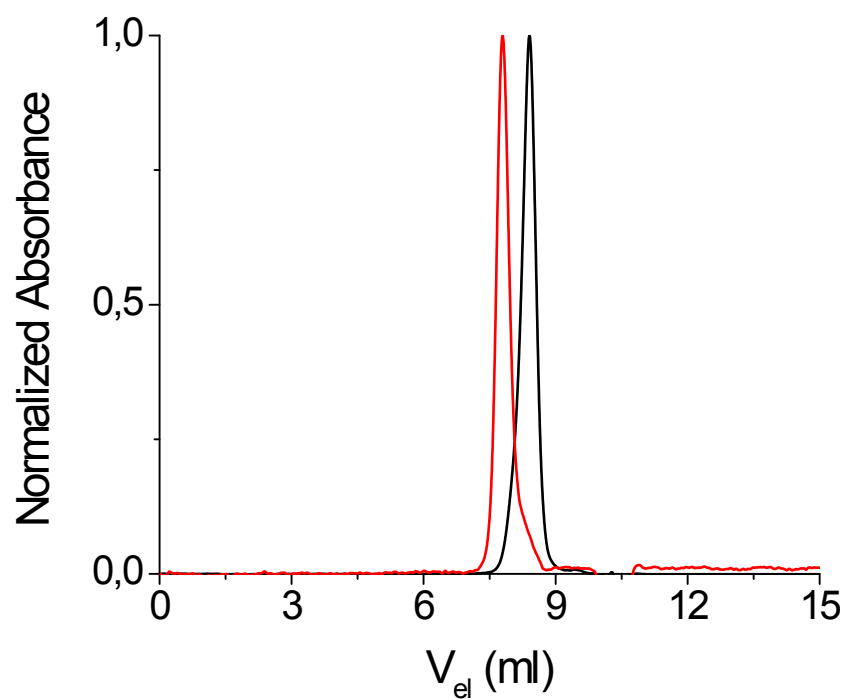

Figure S 14. GPC-chromatogram of **P12**, first block is in black, the second in red

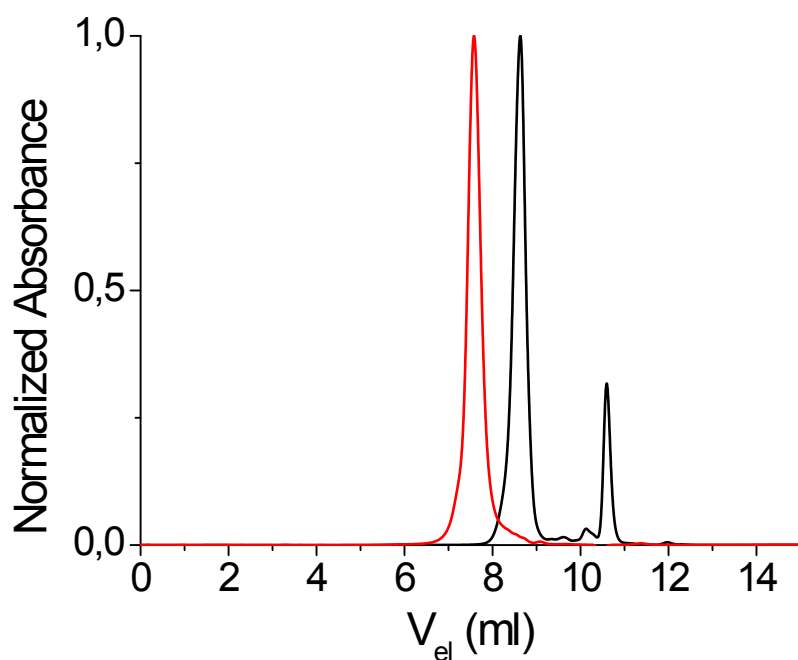

Figure S 15. GPC-chromatogram of **P13**, first block is in black, the second in red

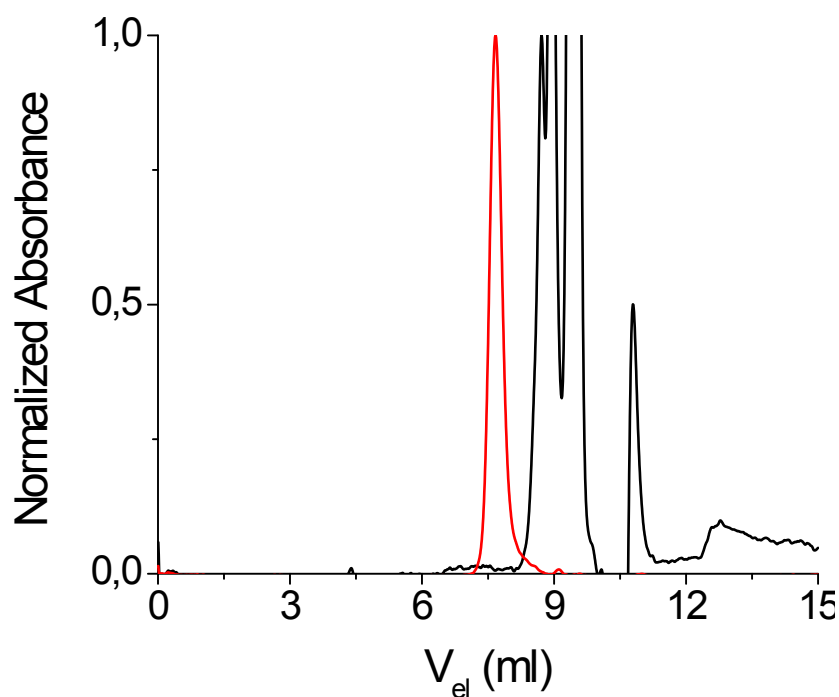

Figure S 16. GPC-chromatogram of **P14**, first block is in black, the second in red. The chromatogram of the first block still contains monomer and stabilizer as purification via Soxhlet extraction was not possible due to the solubility of the short first block in methanol.

## UV-Vis and CD-spectra

The polymers were dissolved in chloroform and methanol was added at constant rate via a syringe pump. For the calculation of the standard deviation of the CD signal, the CD spectrum at the ratio  $\text{CHCl}_3/\text{MeOH}$  with highest CD intensity was recorded 5 times.



P1

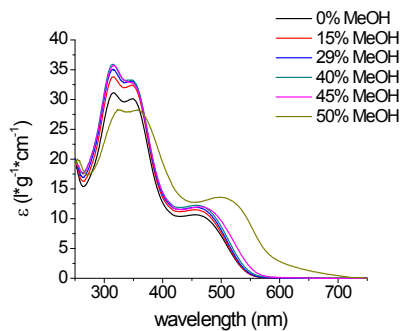

Figure S 17. Solvatochromism experiment for P1

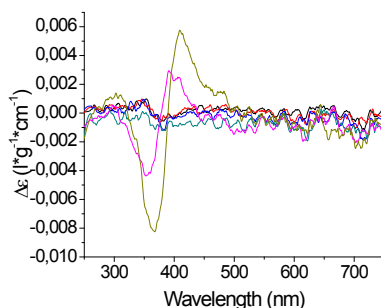

Figure S 18. CD-spectra at different ratios of CHCl<sub>3</sub> and methanol

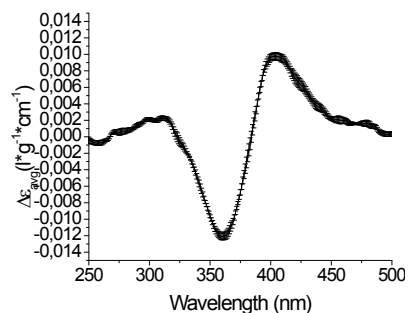

Figure S 19. Averaged CD spectrum of 5 measurements at 50% methanol

P2

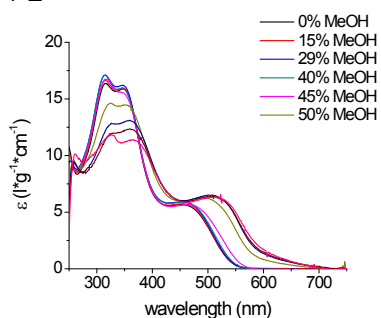

Figure S 20. Solvatochromism experiment for P2

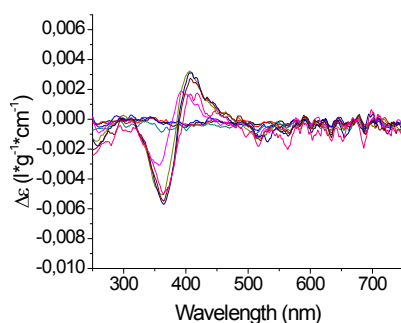

Figure S 21. CD-spectra at different ratios of CHCl<sub>3</sub> and methanol

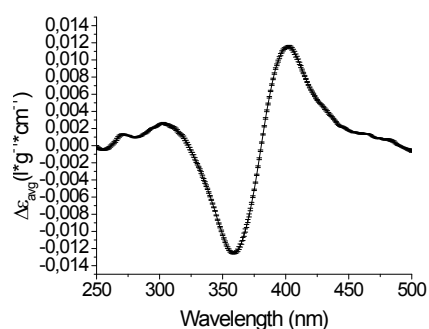

Figure S 22. Averaged CD spectrum of 5 measurements at 55% methanol

P3

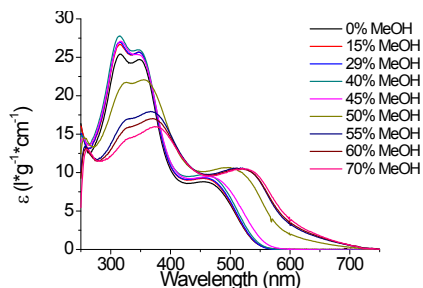

Figure S 23. Solvatochromism experiment for P3

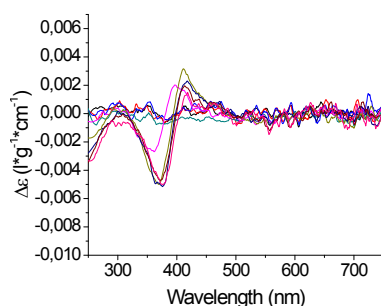

Figure S 24. CD-spectra at different ratios of CHCl<sub>3</sub> and methanol

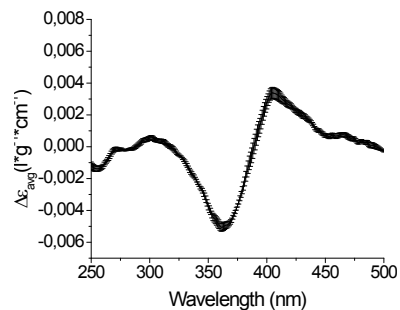

Figure S 25. Averaged CD spectrum of 5 measurements at 50% methanol

P4

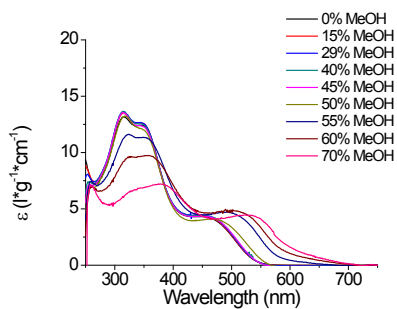

Figure S 26. Solvatochromism experiment for P4

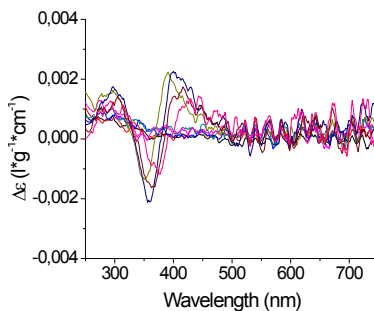

Figure S 27. CD-spectra at different ratios of CHCl<sub>3</sub> and methanol

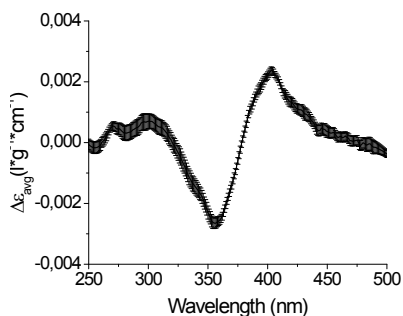

Figure S 28. Averaged CD spectrum of 5 measurements at 55% methanol

P5

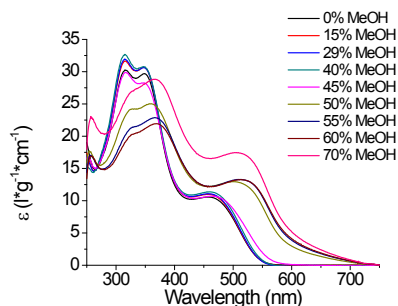

Figure S 29. Solvatochromism experiment for **P5**

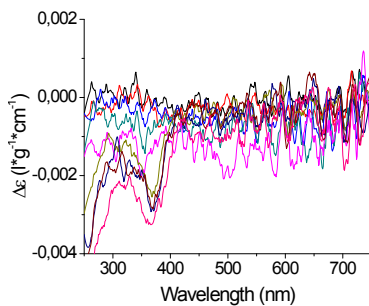

Figure S 30. CD-spectra at different ratios of  $\text{CHCl}_3$  and methanol

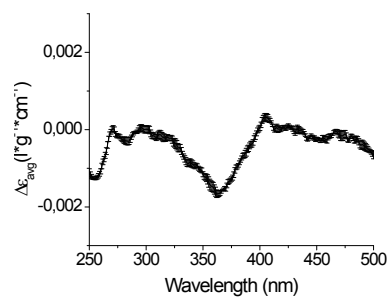

Figure S 31. Averaged CD spectrum of 5 measurements at 50% methanol

P6

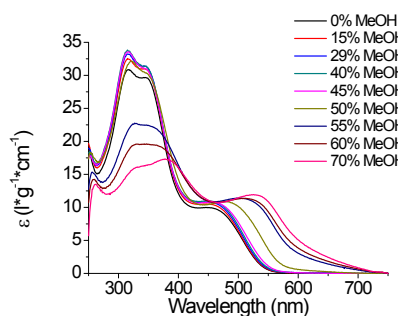

Figure S 32. Solvatochromism experiment for **P6**

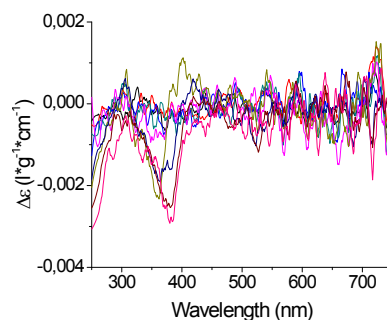

Figure S 33. CD-spectra at different ratios of  $\text{CHCl}_3$  and methanol

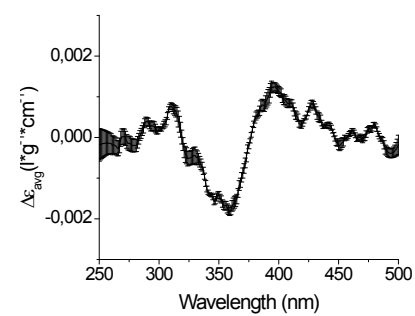

Figure S 34. Averaged CD spectrum of 5 measurements at 50% methanol

P7

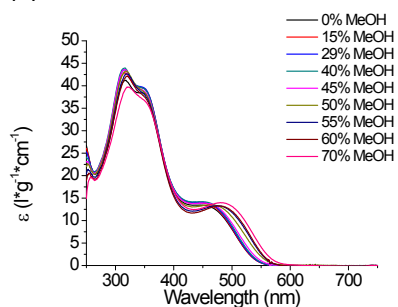

Figure S 35. Solvatochromism experiment for **P7**

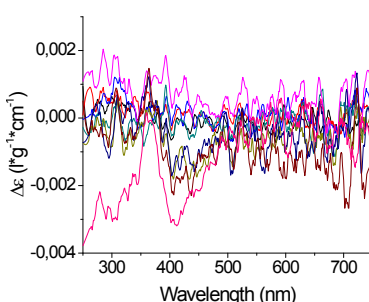

Figure S 36. CD-spectra at different ratios of  $\text{CHCl}_3$  and methanol

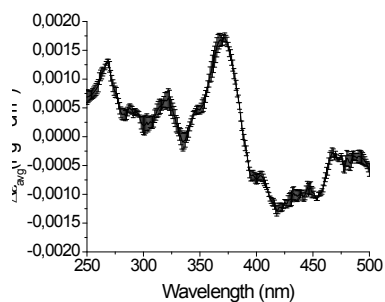

Figure S 37. Averaged CD spectrum of 5 measurements at 60% methanol

P8

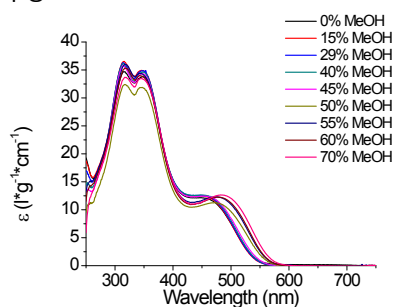

Figure S 38. Solvatochromism experiment for **P8**

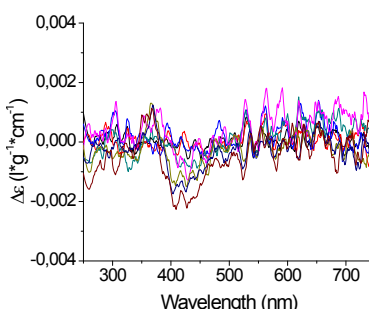

Figure S 39. CD-spectra at different ratios of  $\text{CHCl}_3$  and methanol

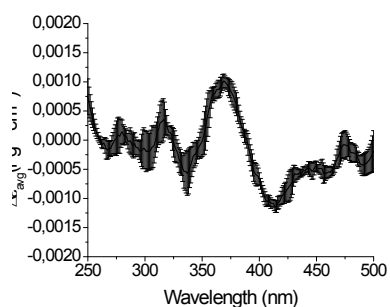

Figure S 40. Averaged CD spectrum of 5 measurements at 55% methanol

P9

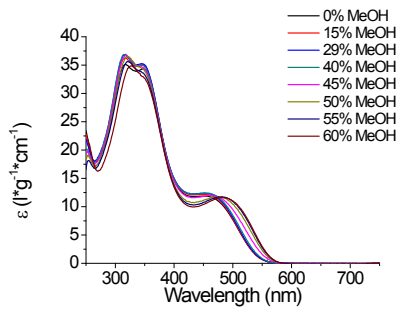

Figure S 41. Solvatochromism experiment for **P9**

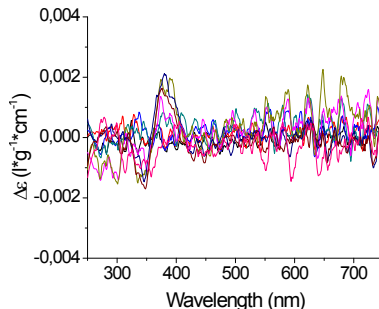

Figure S 42. CD-spectra at different ratios of  $\text{CHCl}_3$  and methanol

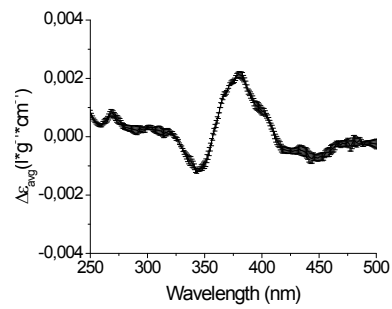

Figure S 43. Averaged CD spectrum of 5 measurements at 55% methanol

P10

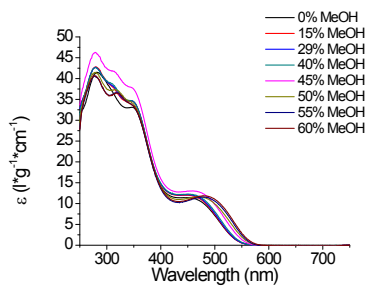

Figure S 44. Solvatochromism experiment for **P10**

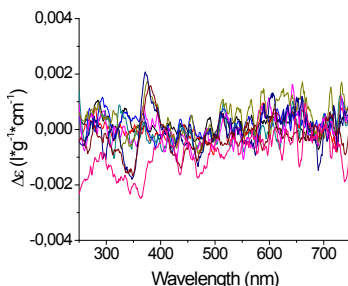

Figure S 45. CD-spectra at different ratios of  $\text{CHCl}_3$  and methanol

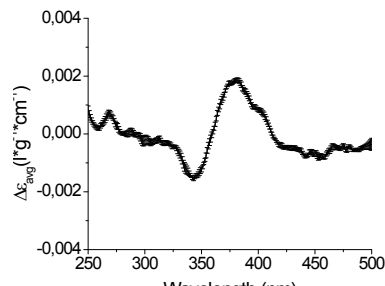

Figure S 46. Averaged CD spectrum of 5 measurements at 60% methanol

P11

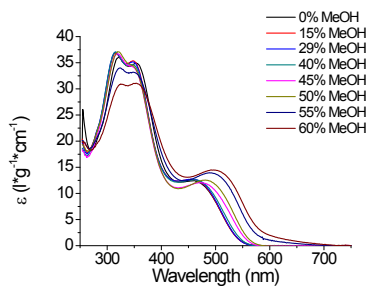

Figure S 47. Solvatochromism experiment for **P11**

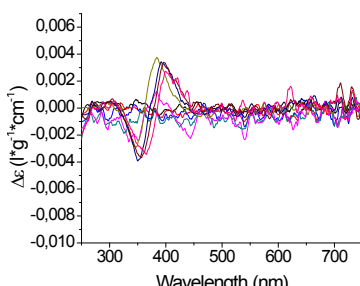

Figure S 48. CD-spectra at different ratios of  $\text{CHCl}_3$  and methanol

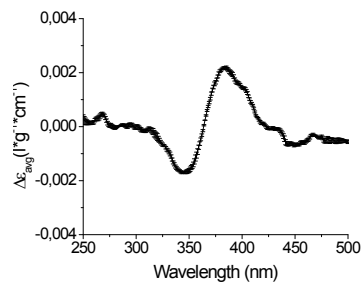

Figure S 49. Averaged CD spectrum of 5 measurements at 50% methanol

P12

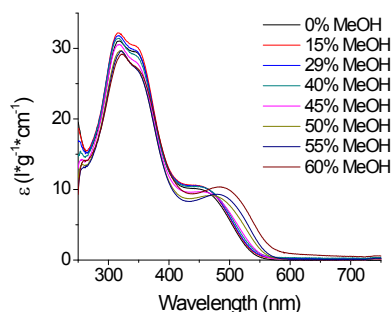

Figure S 50. Solvatochromism experiment for **P12**

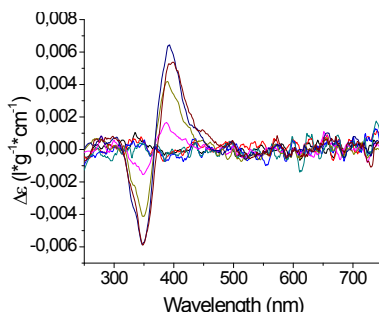

Figure S 51. CD-spectra at different ratios of  $\text{CHCl}_3$  and methanol

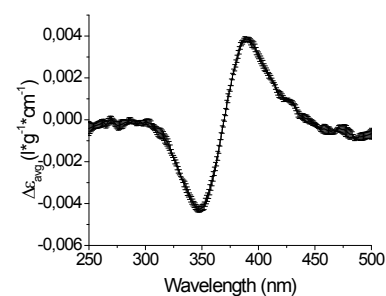

Figure S 52. Averaged CD spectrum of 5 measurements at 50% methanol

P13

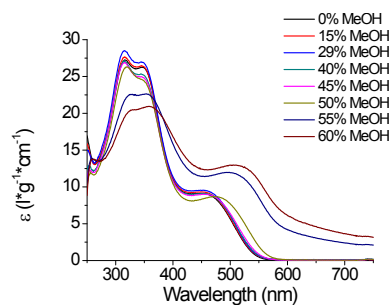

Figure S 53. Solvatochromism experiment for **P13**

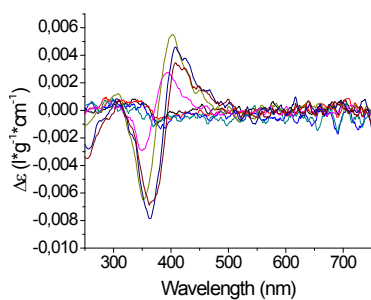

Figure S 54. CD-spectra at different ratios of  $\text{CHCl}_3$  and methanol

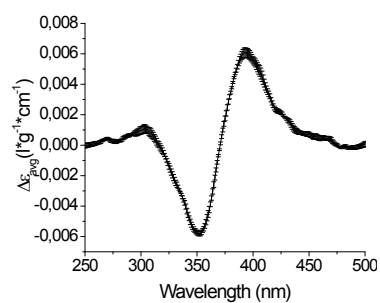

Figure S 55. Averaged CD spectrum of 5 measurements at 50% methanol

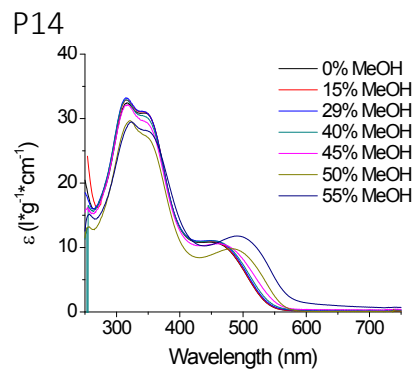

Figure S 56. Solvatochromism experiment for **P14**

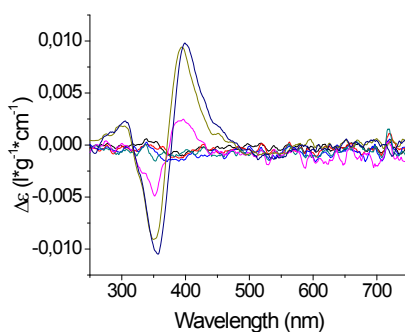

Figure S 57. CD-spectra at different ratios of  $\text{CHCl}_3$  and methanol

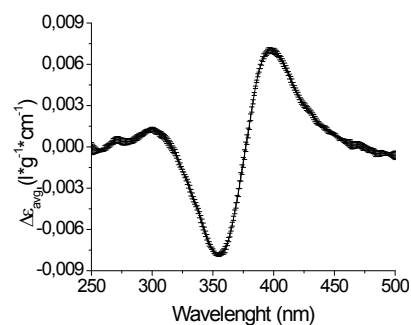

Figure S 58. Averaged CD spectrum of 5 measurements at 50% methanol

## NMR spectra

All spectra were recorded in  $\text{CDCl}_3$  with 0.1 v/v TMS.

$^1\text{H}$  NMR and  $^{13}\text{C}$  NMR of the synthesized compounds

### 3R

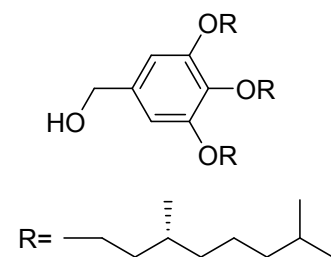

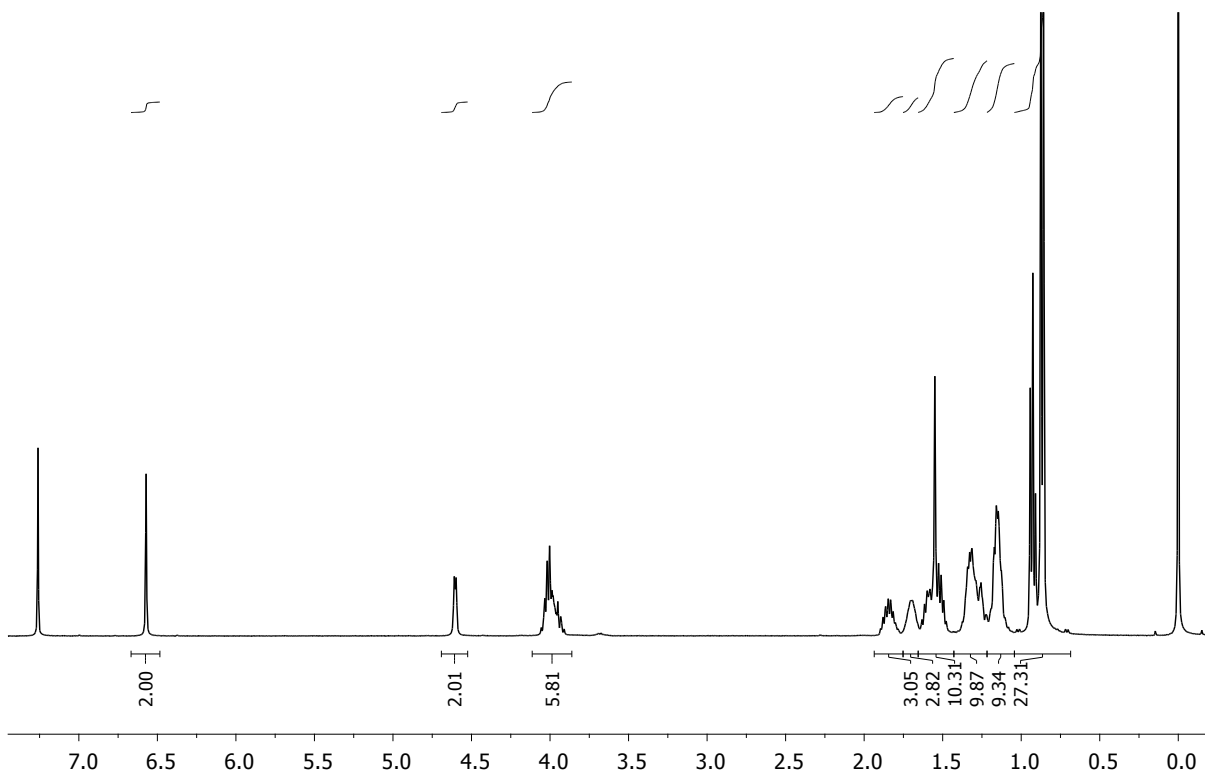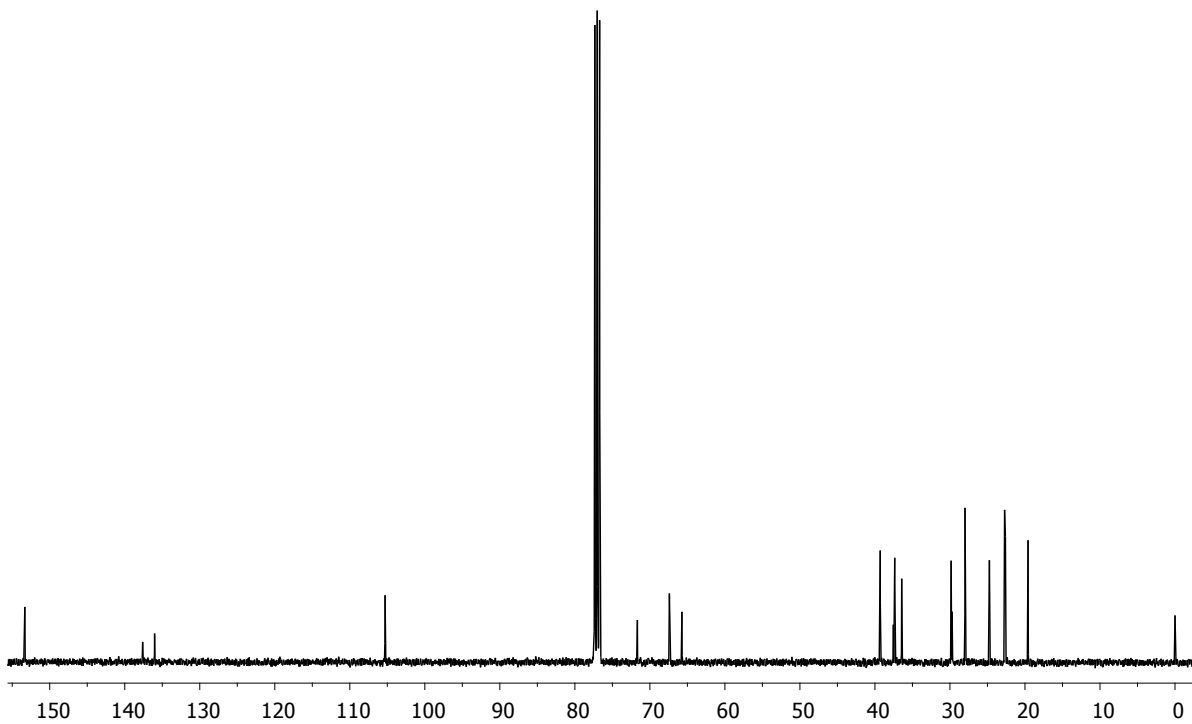

4R

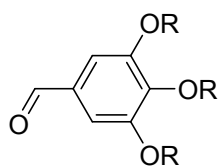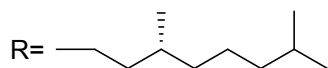

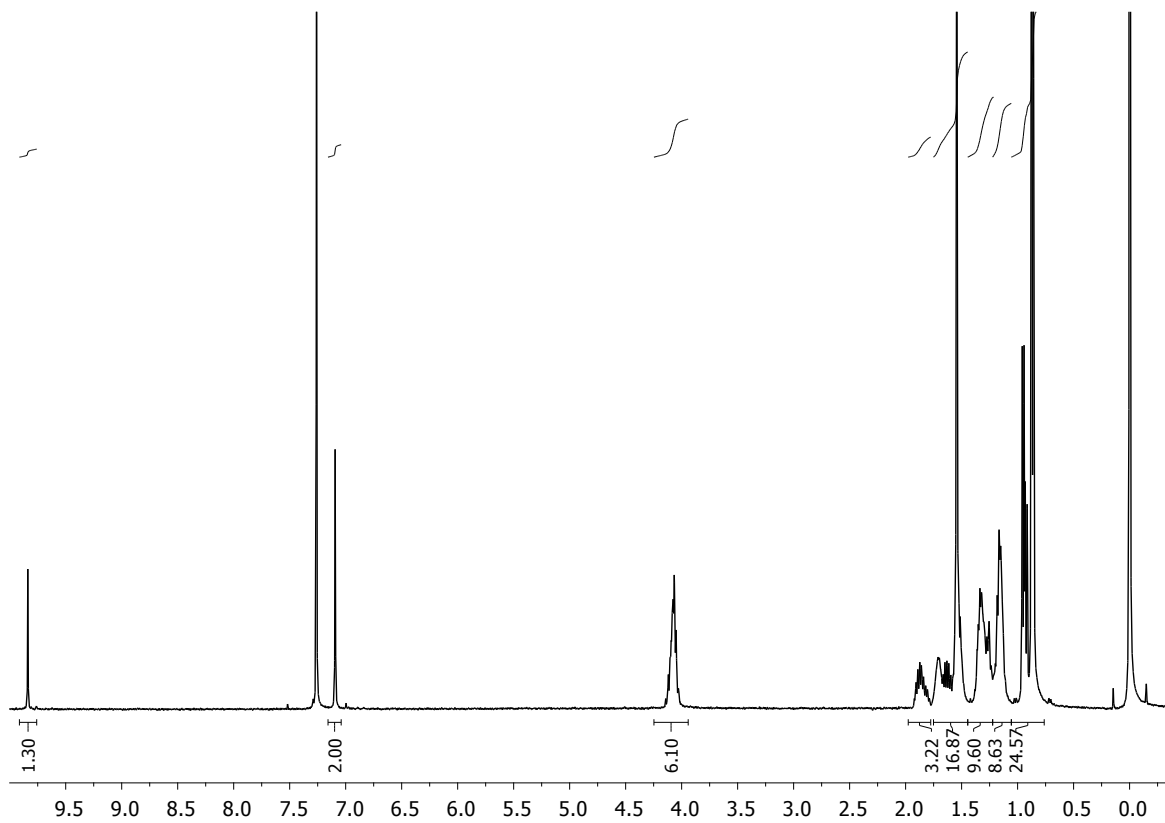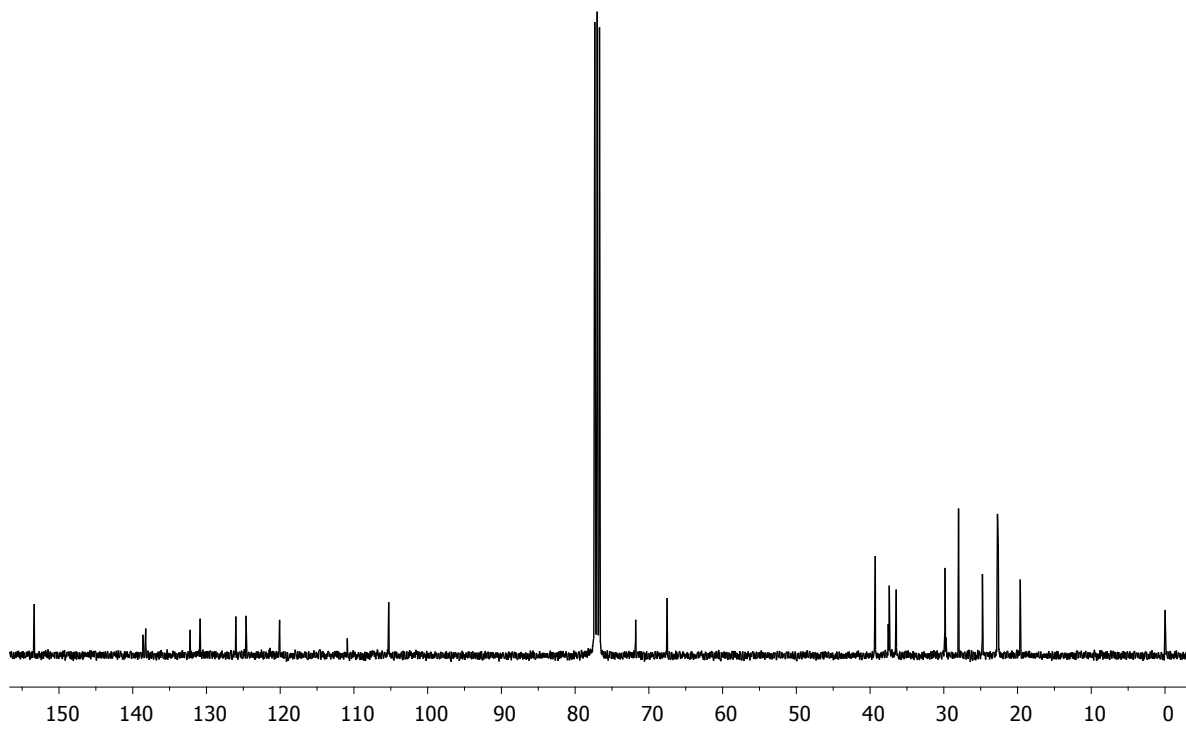

6R

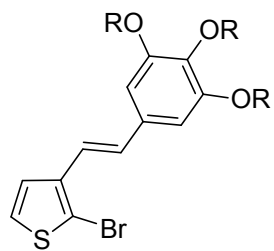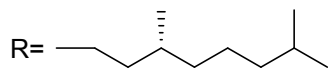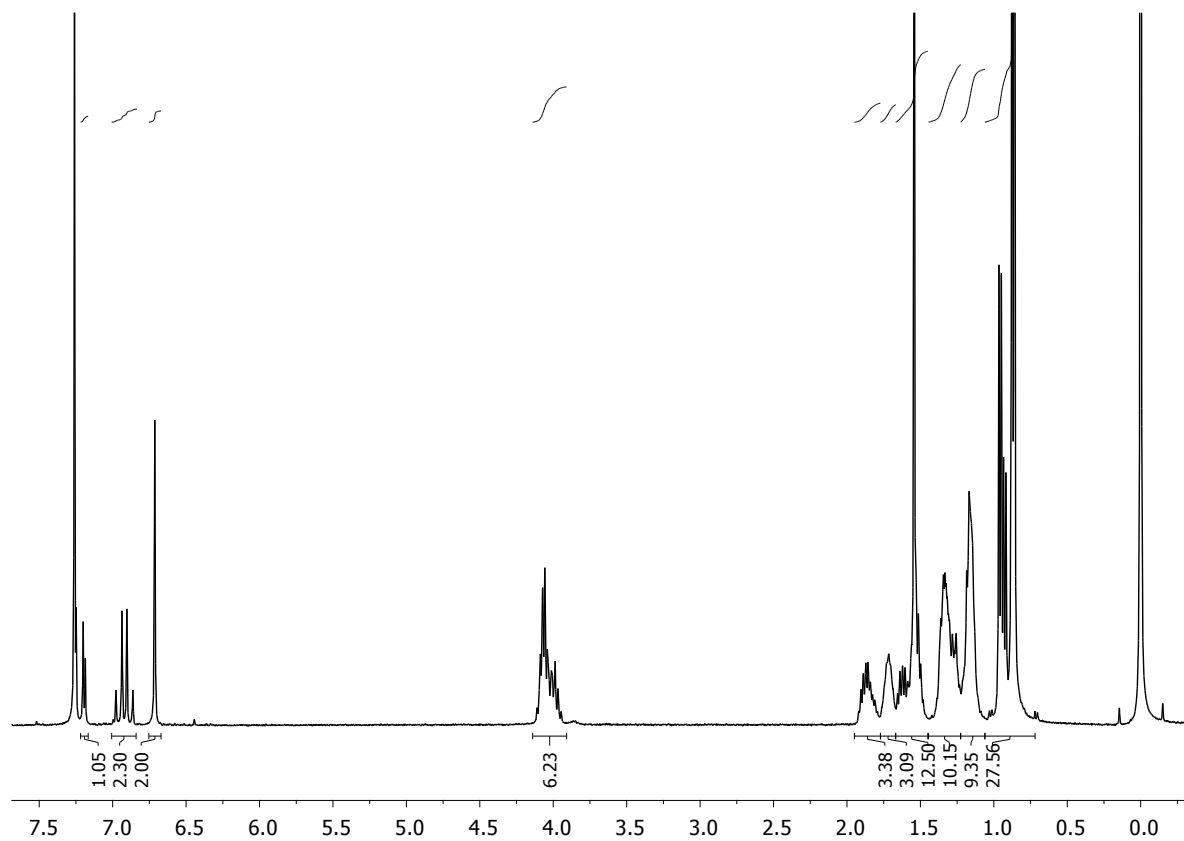

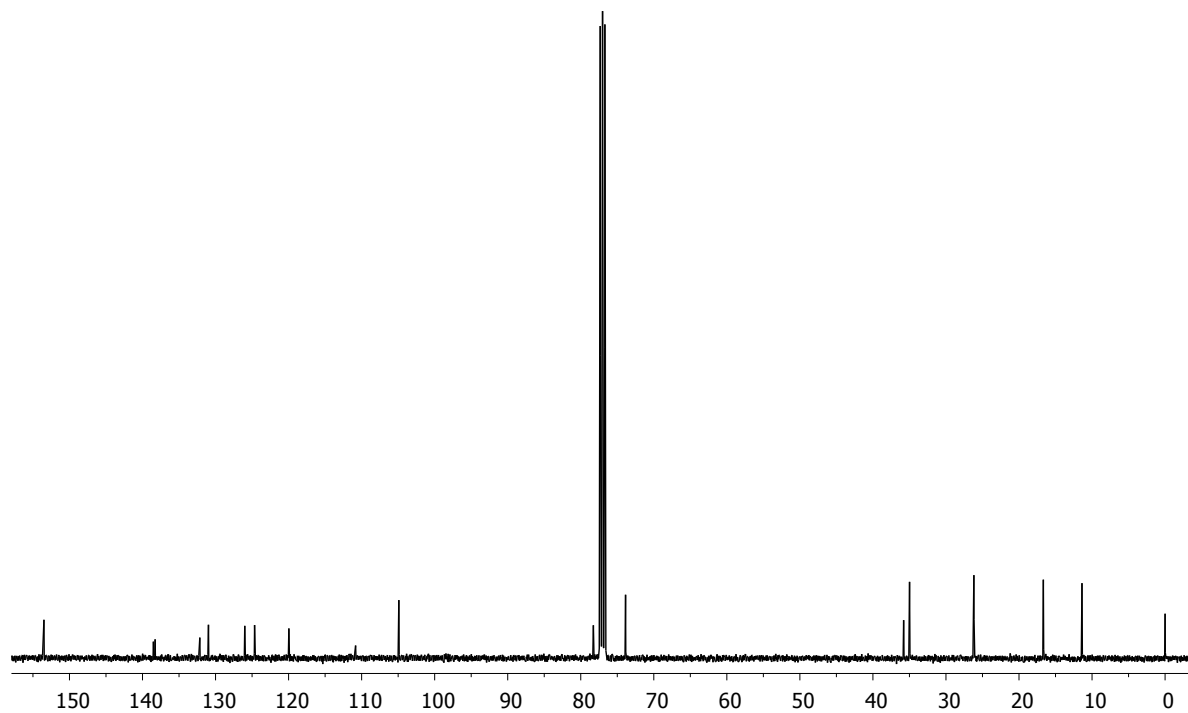

6B

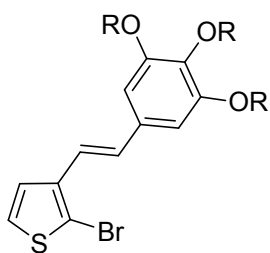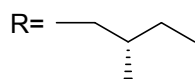



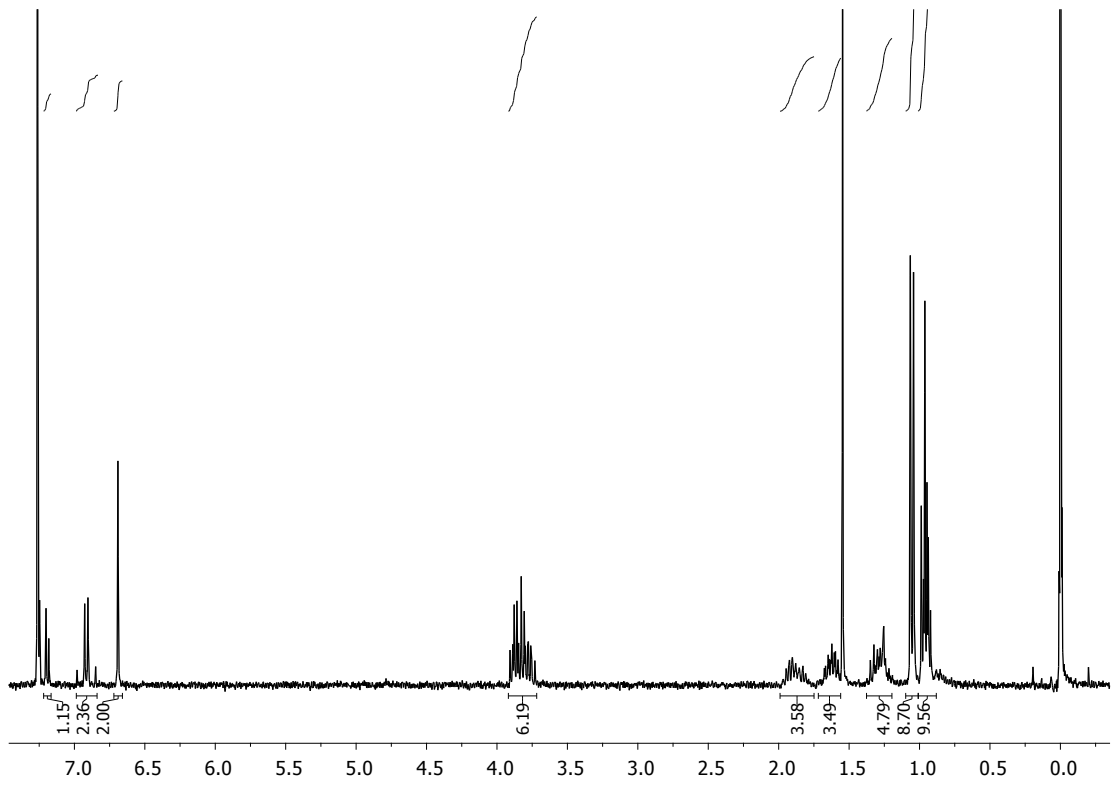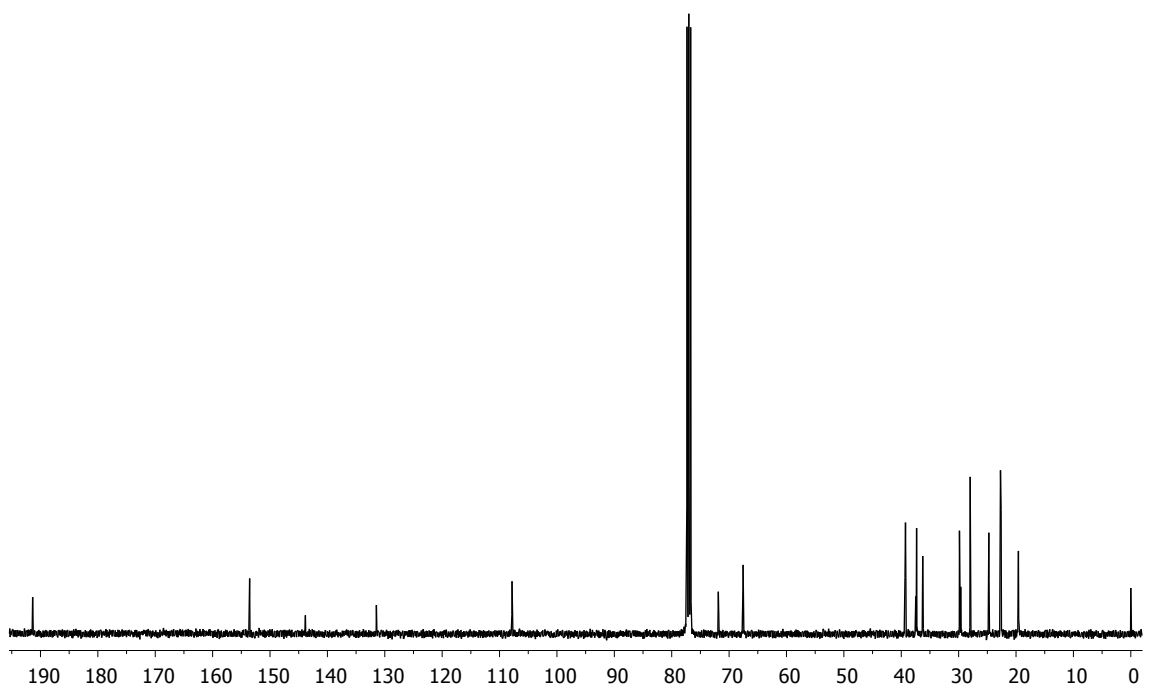

P1

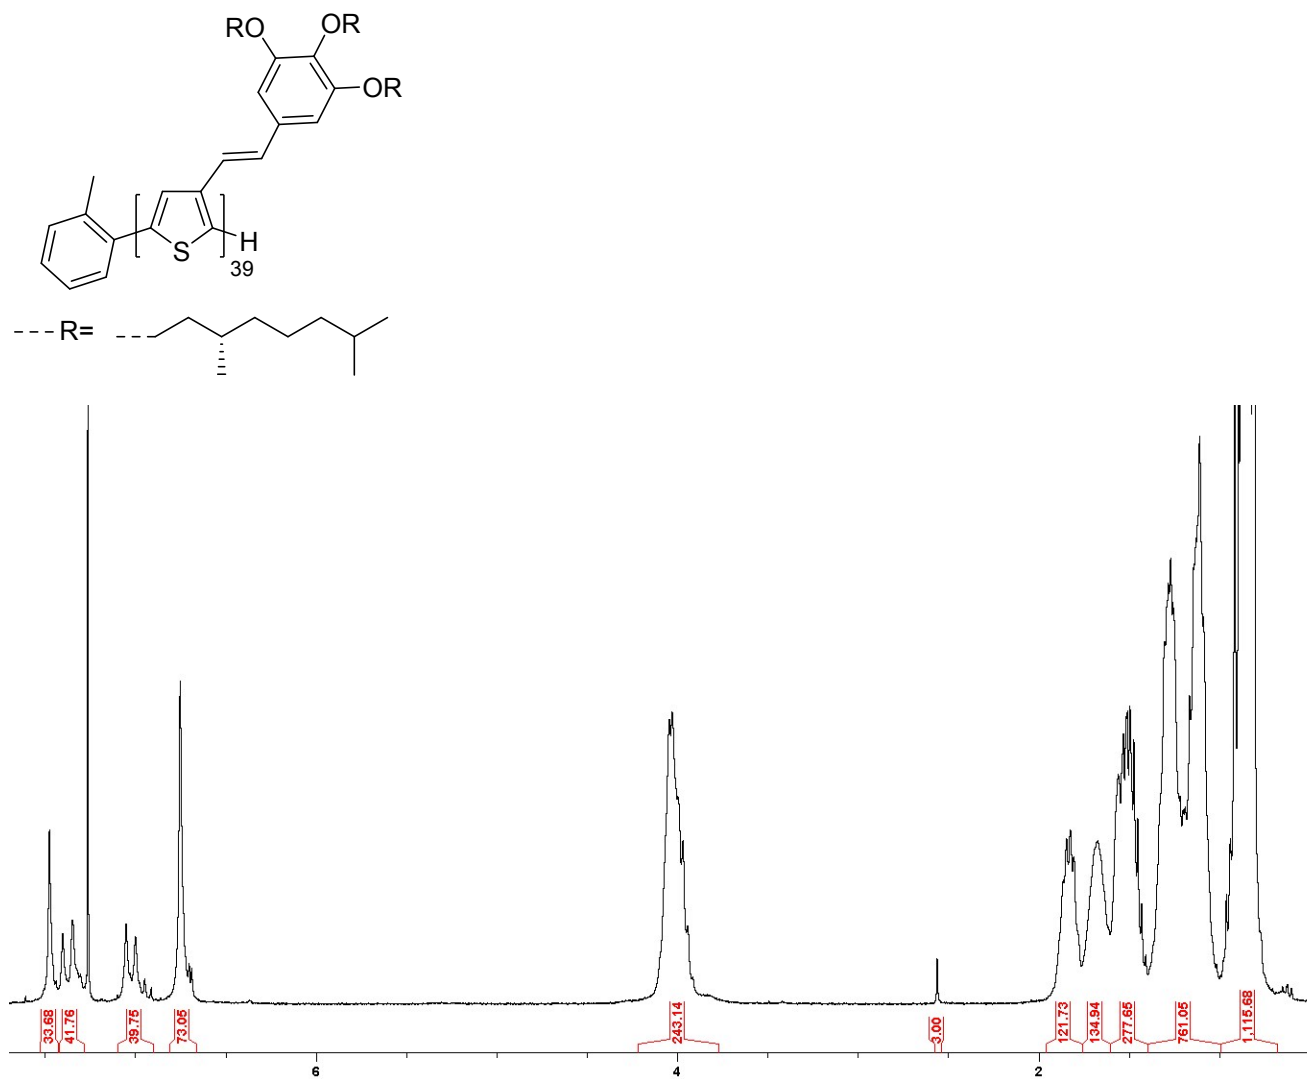

P2

Total Block copolymer

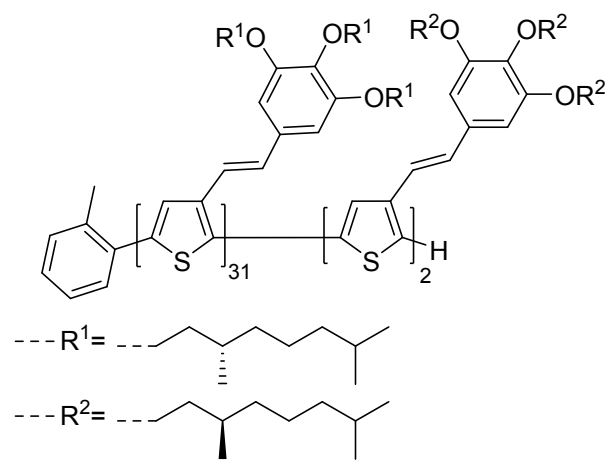

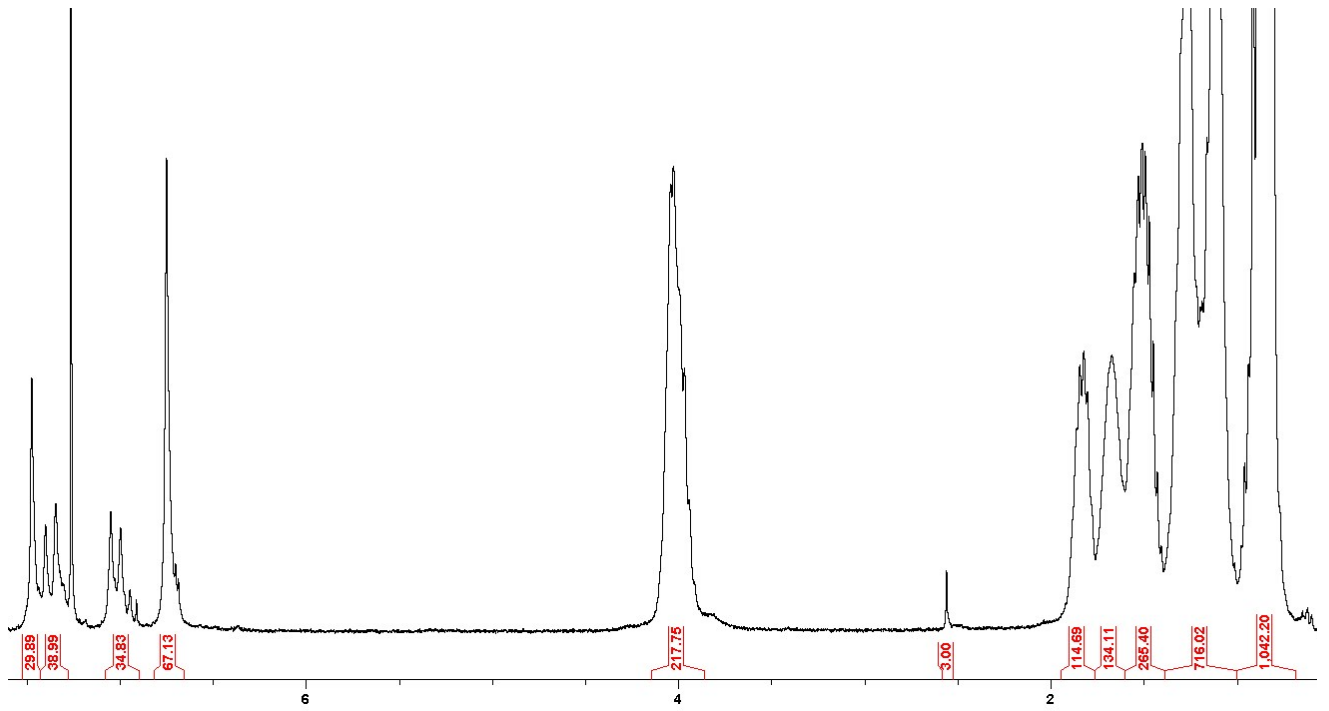

First block

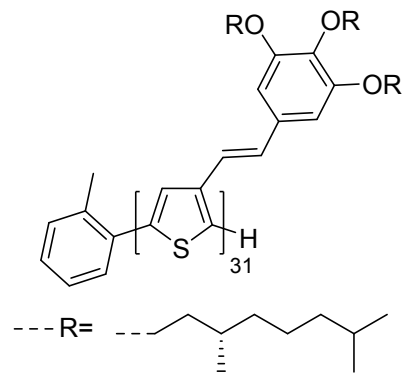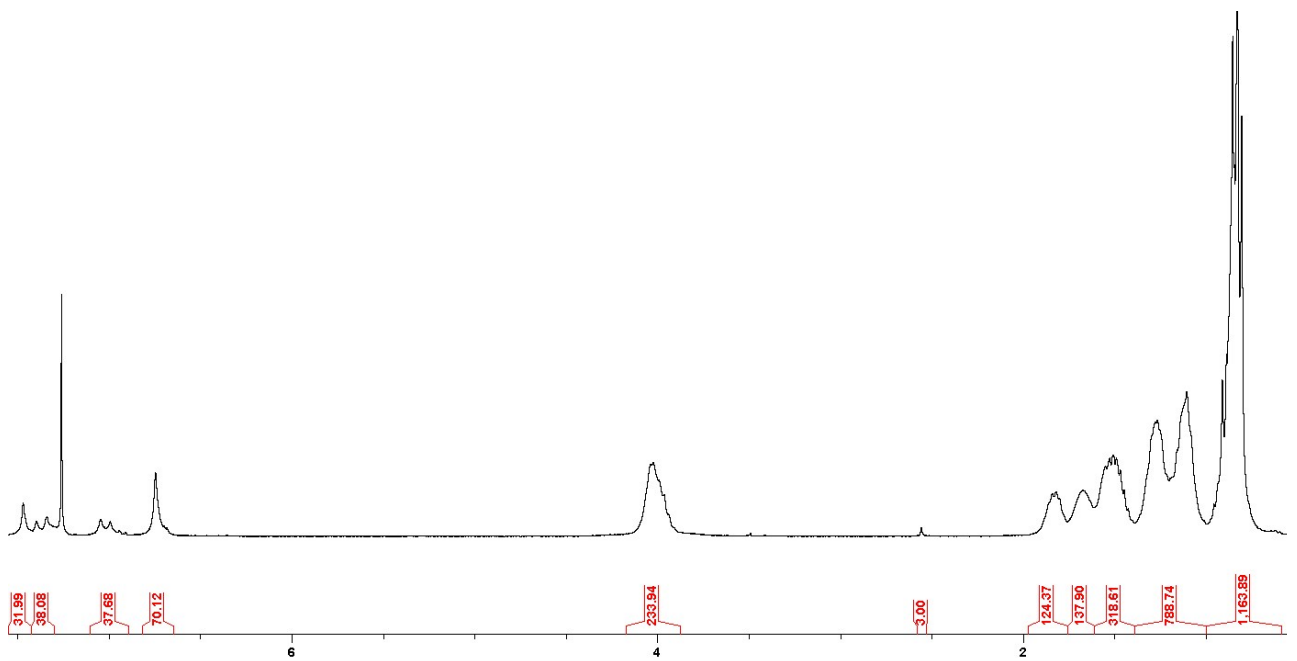

### P3

Total block copolymer

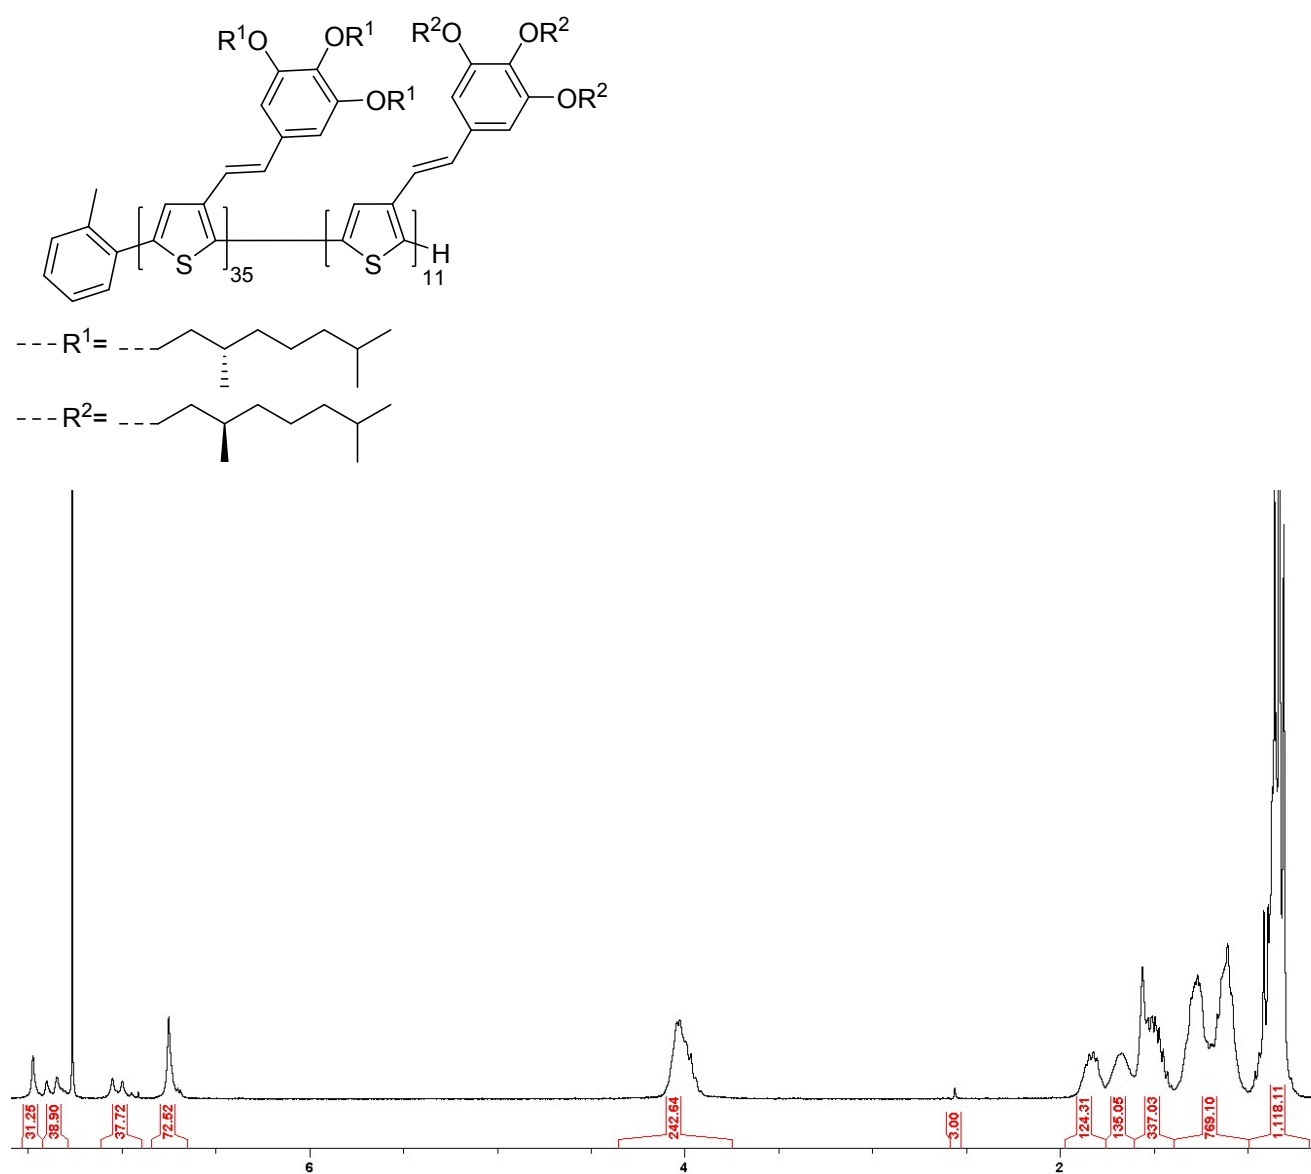

First block

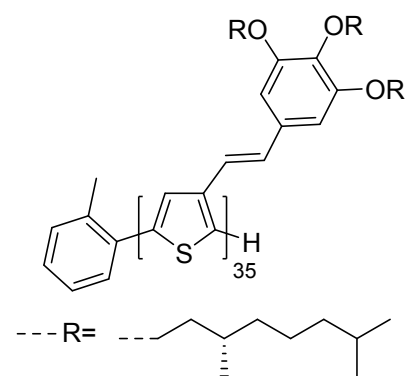

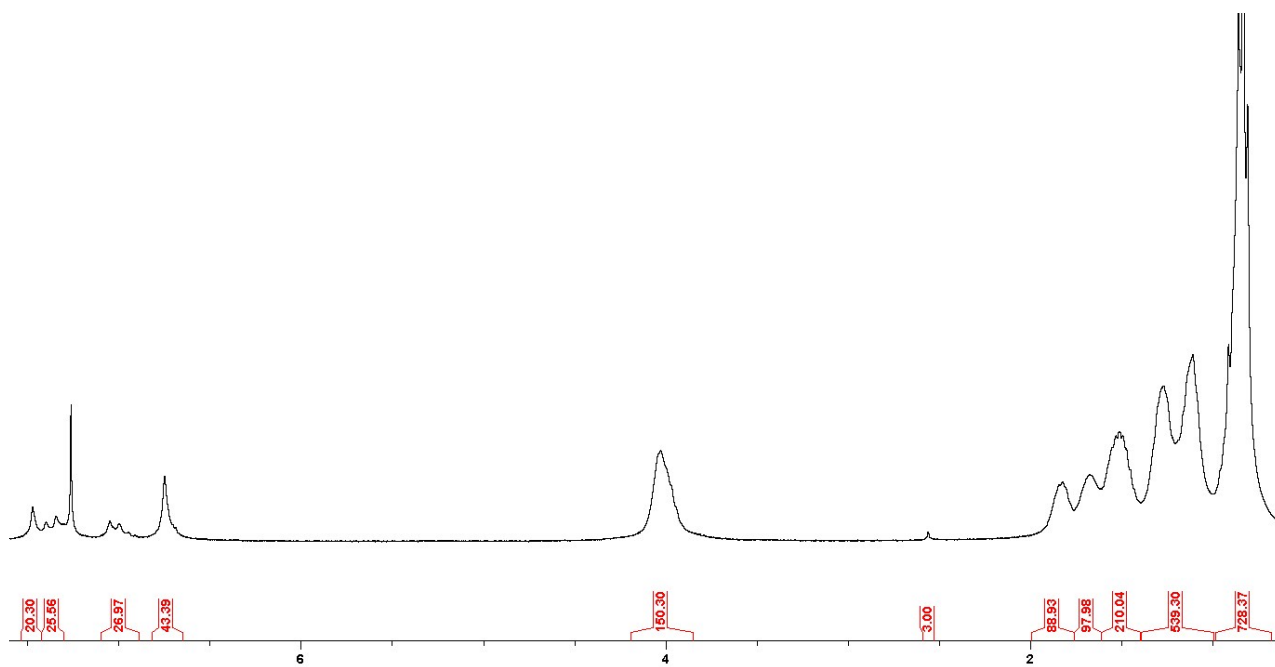

### P4

Total block copolymer

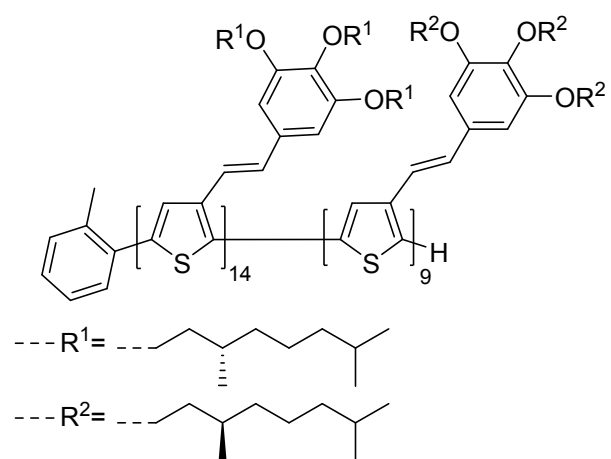

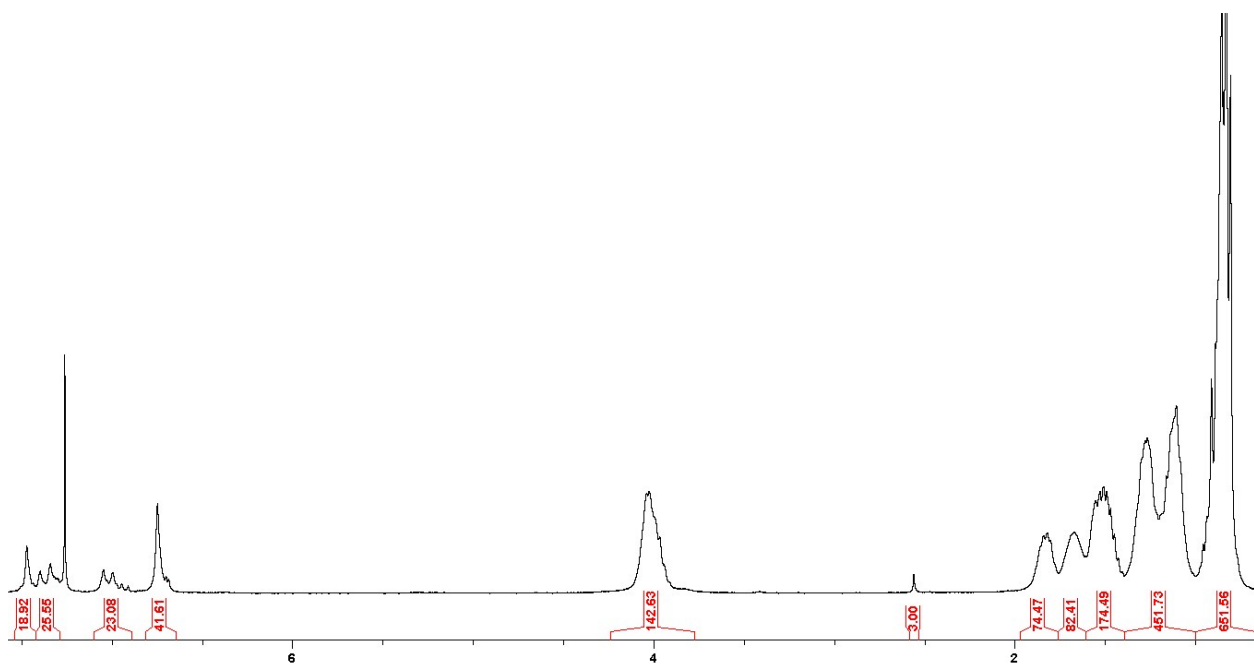

First block

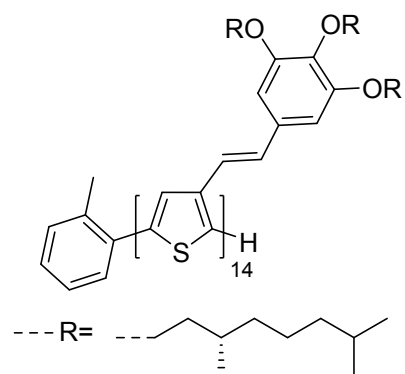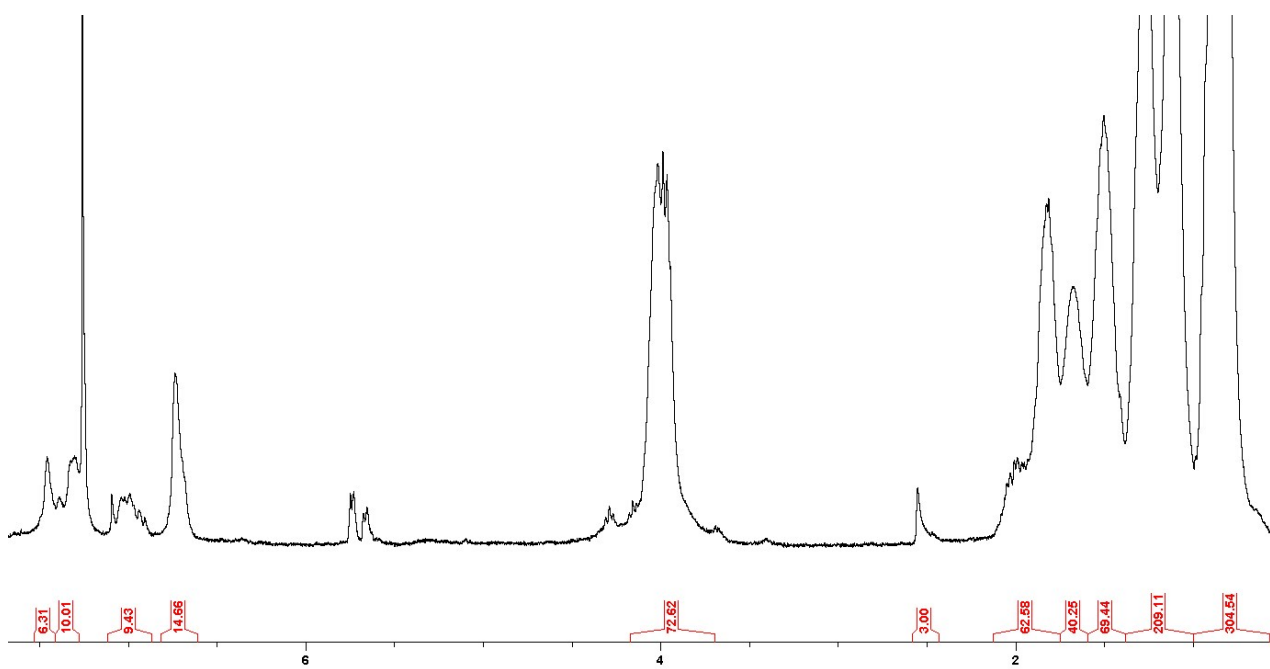

P5

Total block copolymer

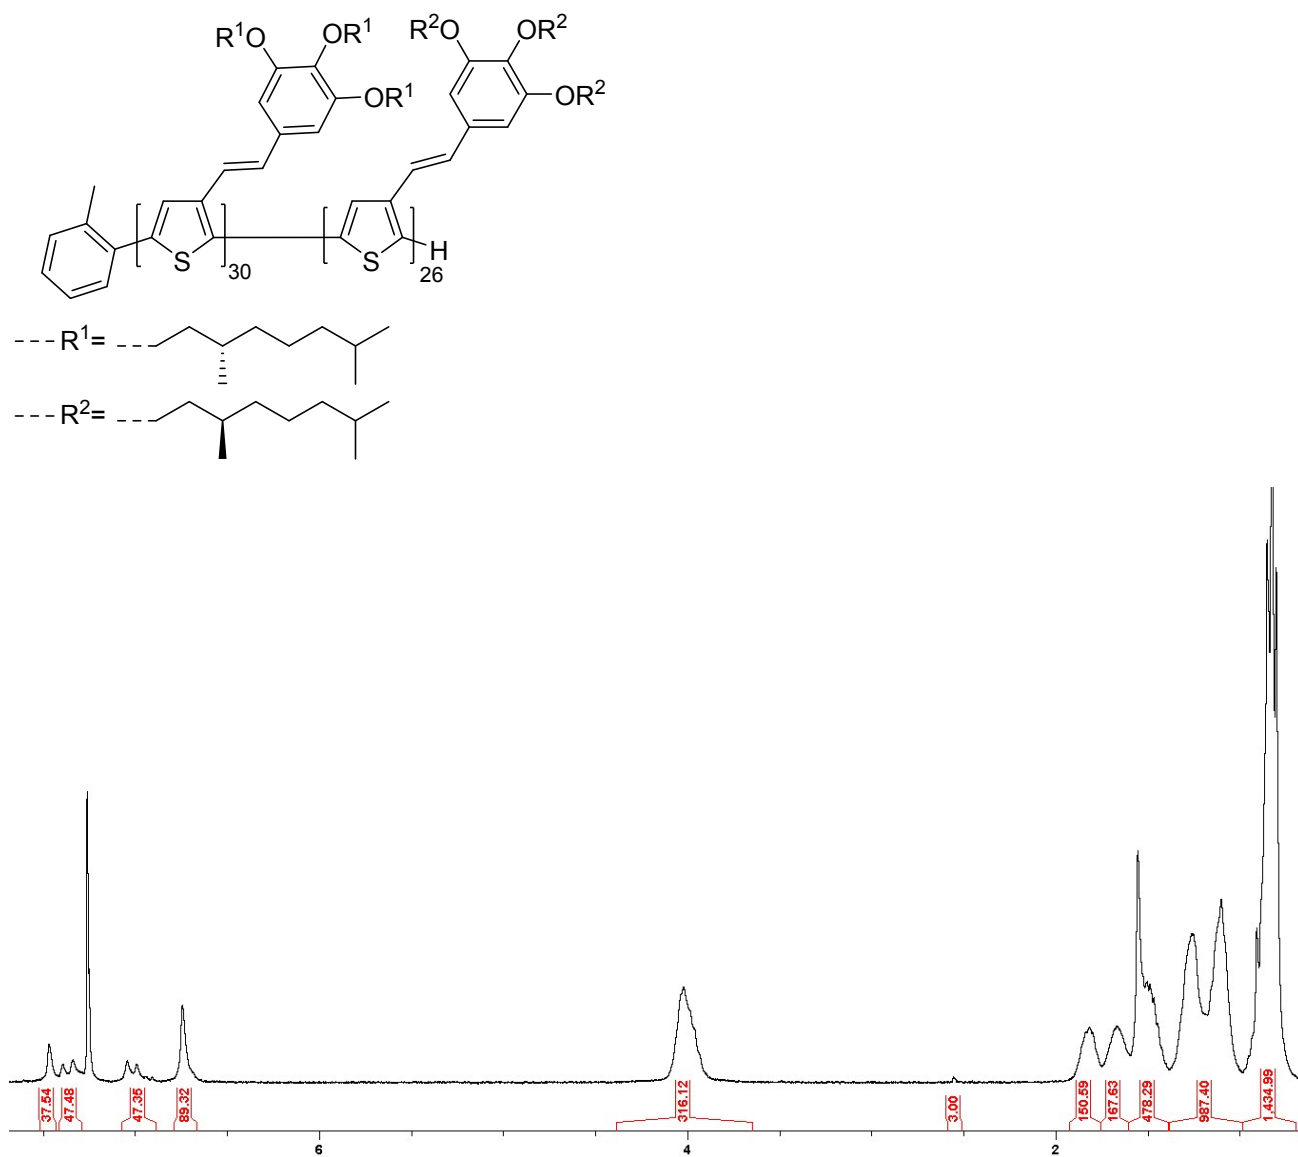

First block

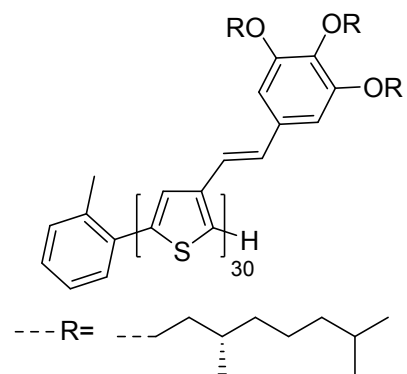

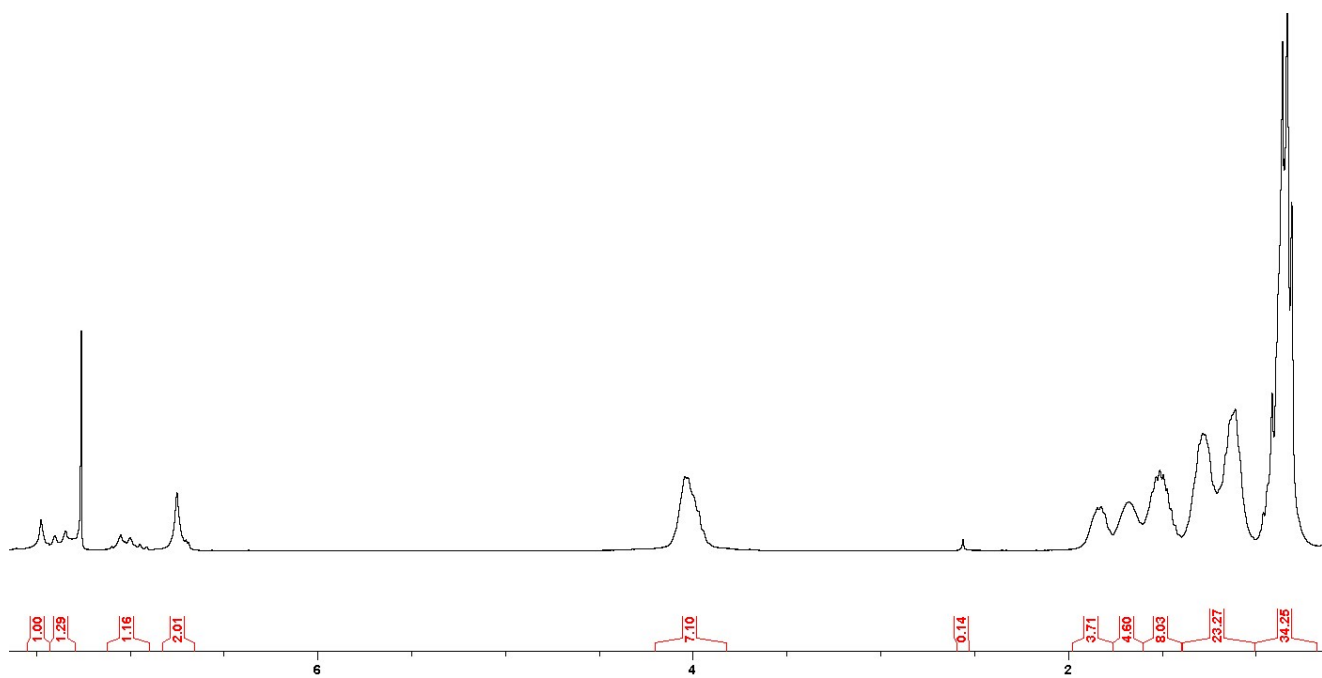

P6

Total block copolymer

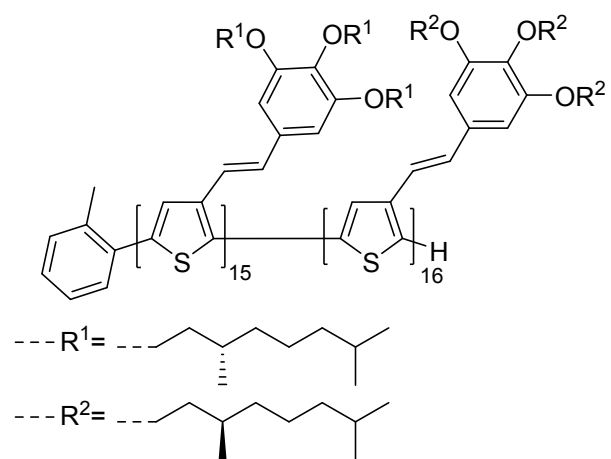



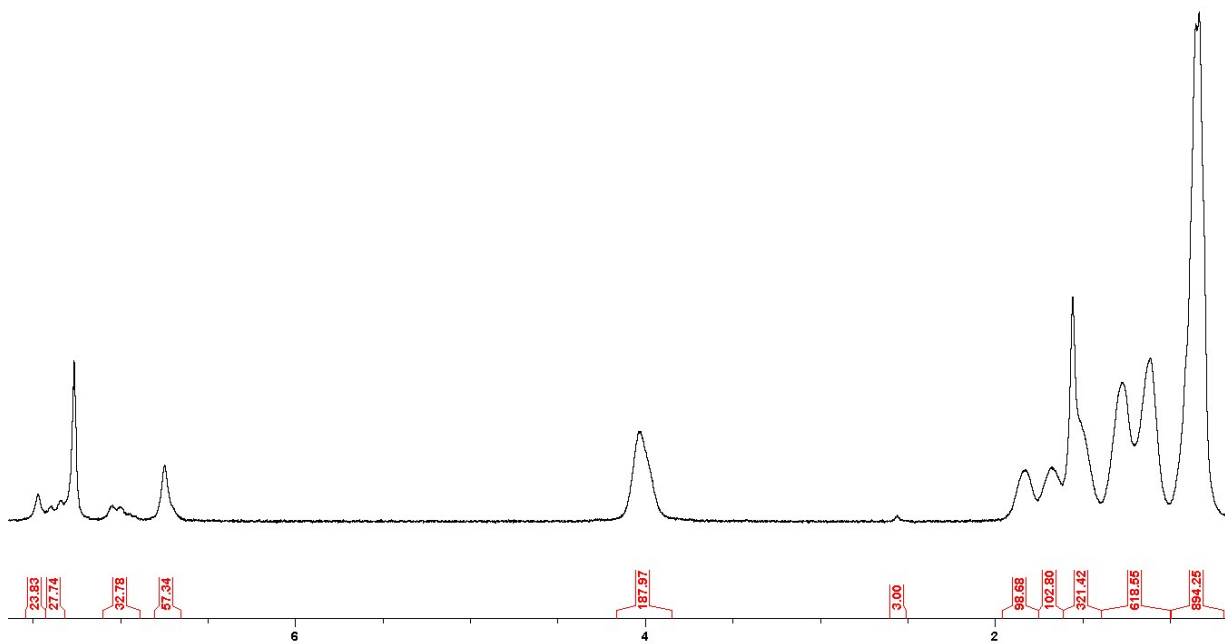

First block

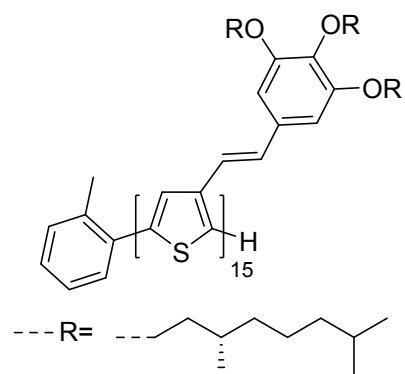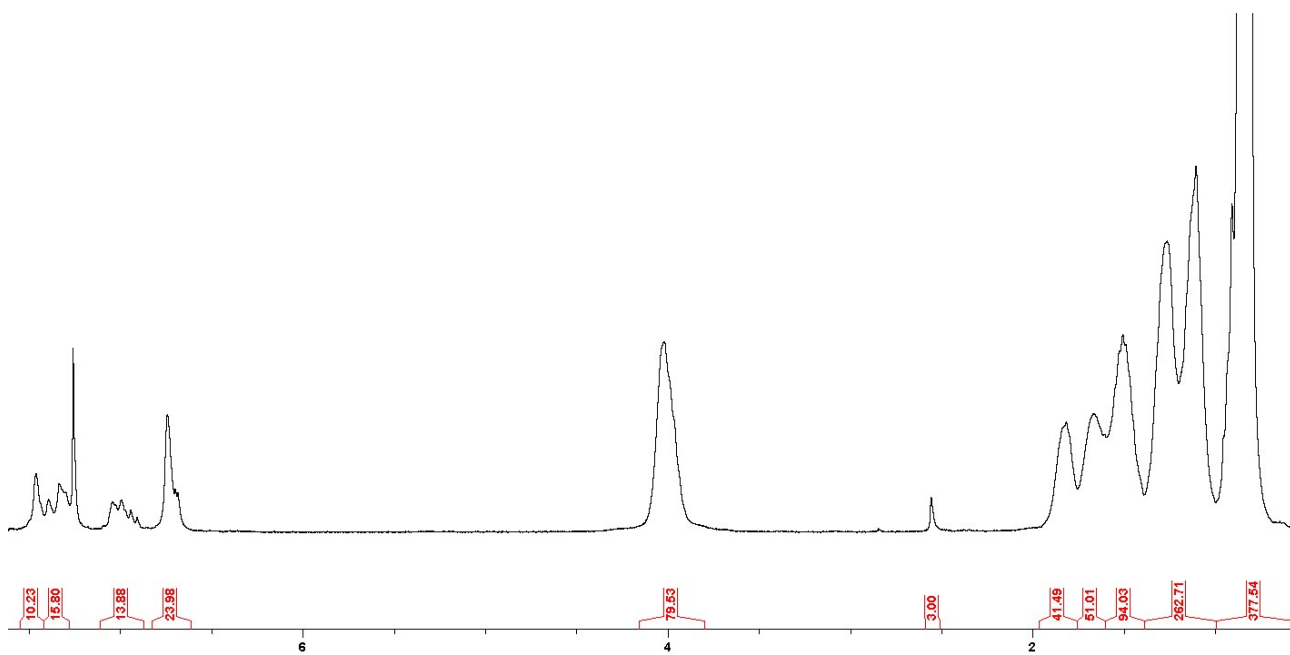

P7

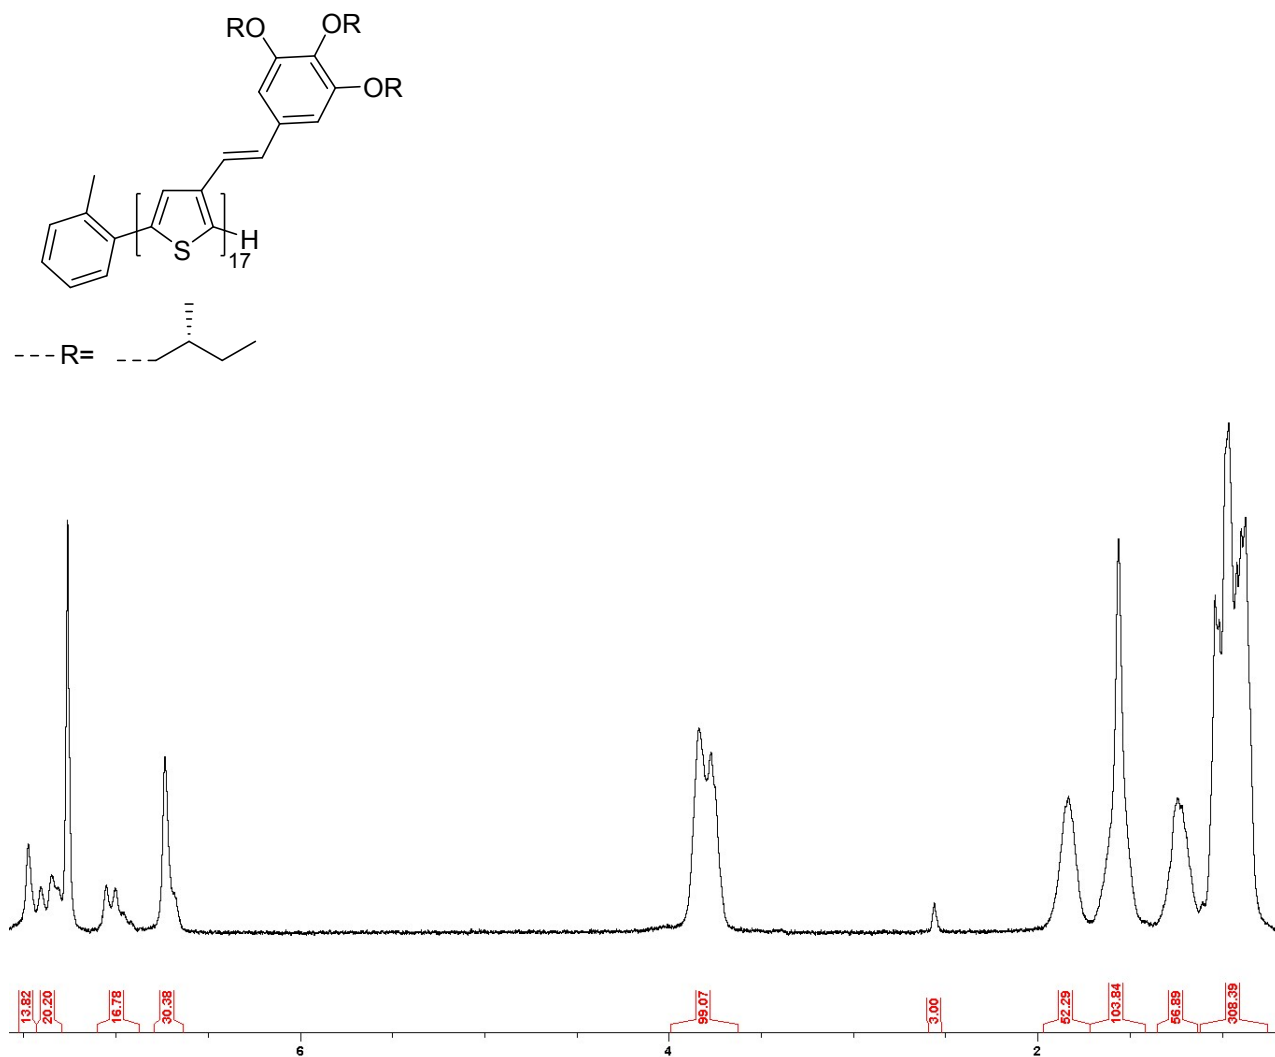

P8

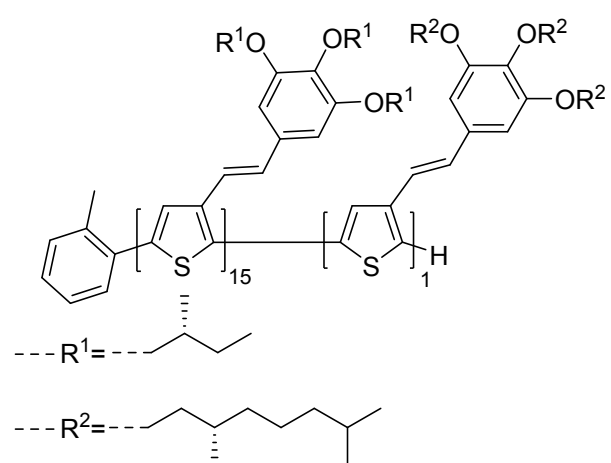

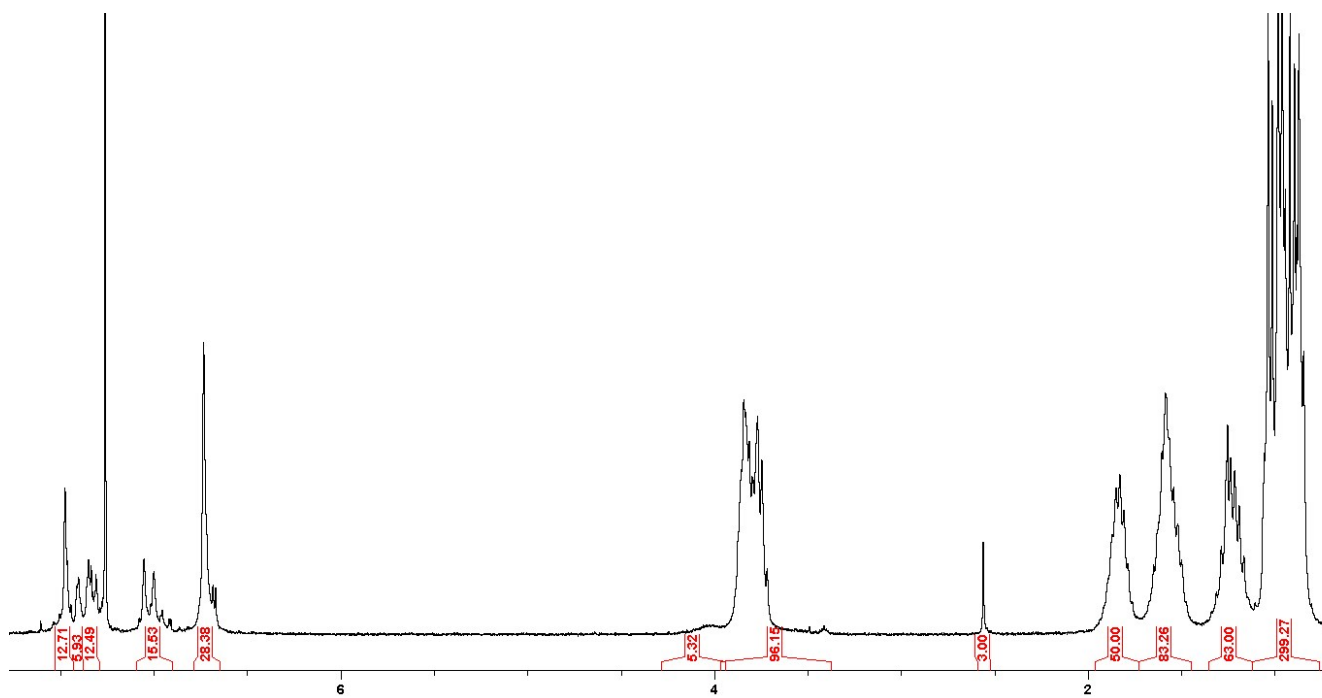

P9

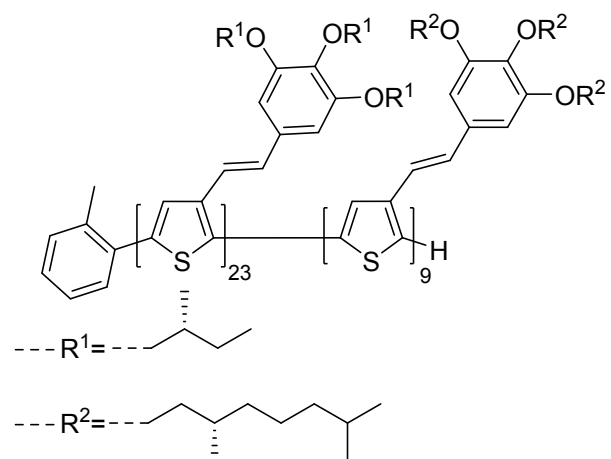

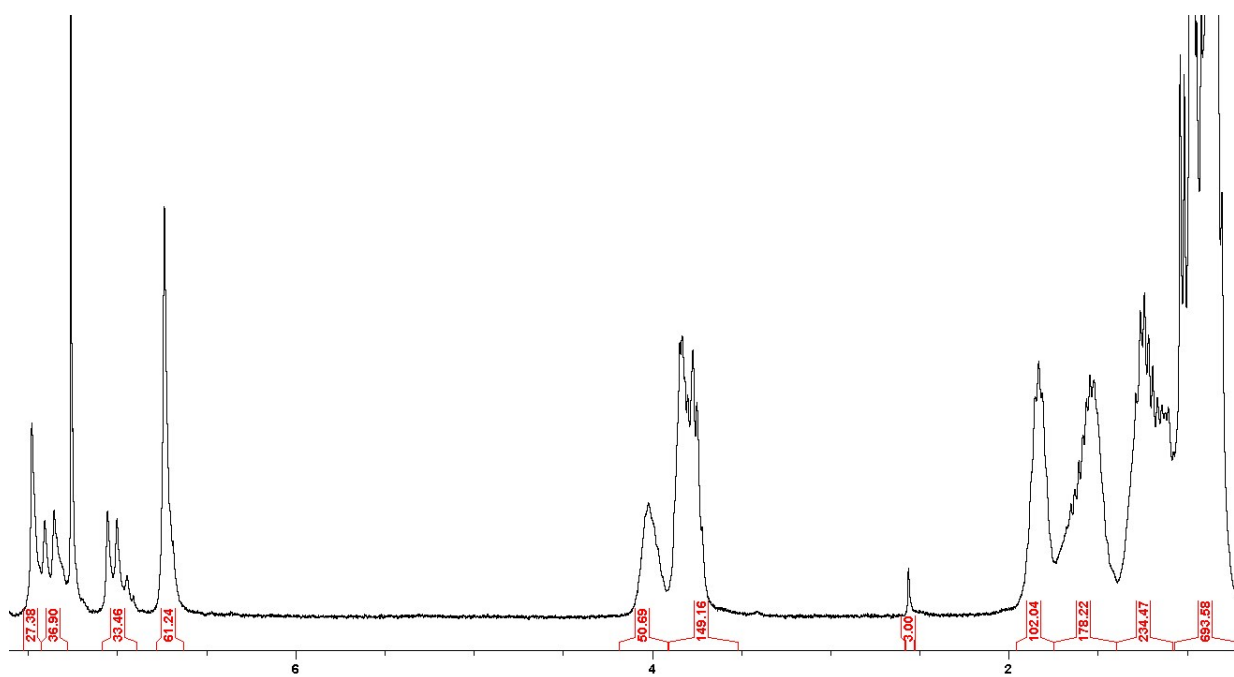

P10

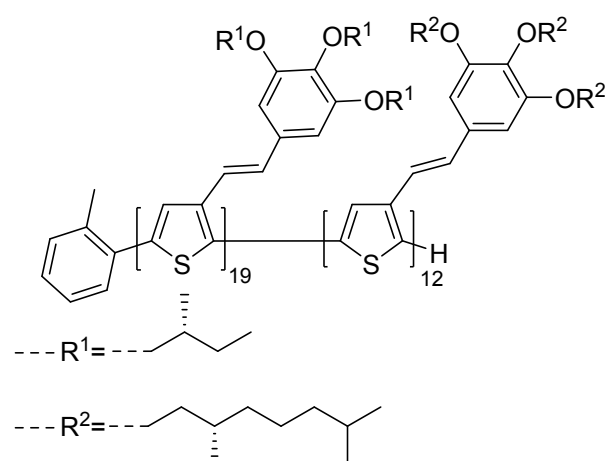

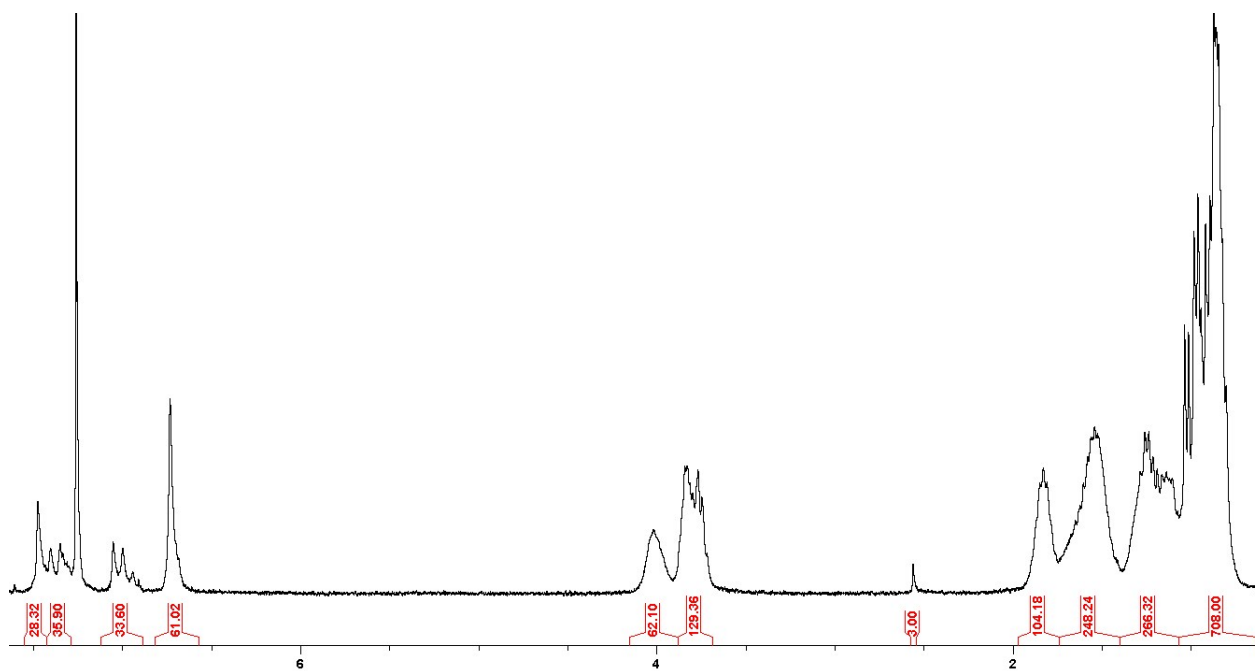

P11

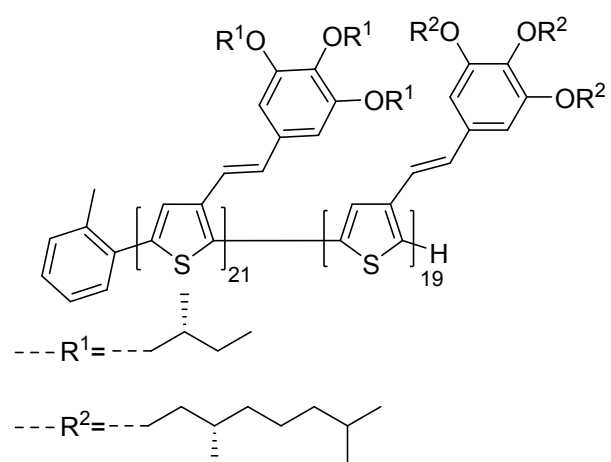

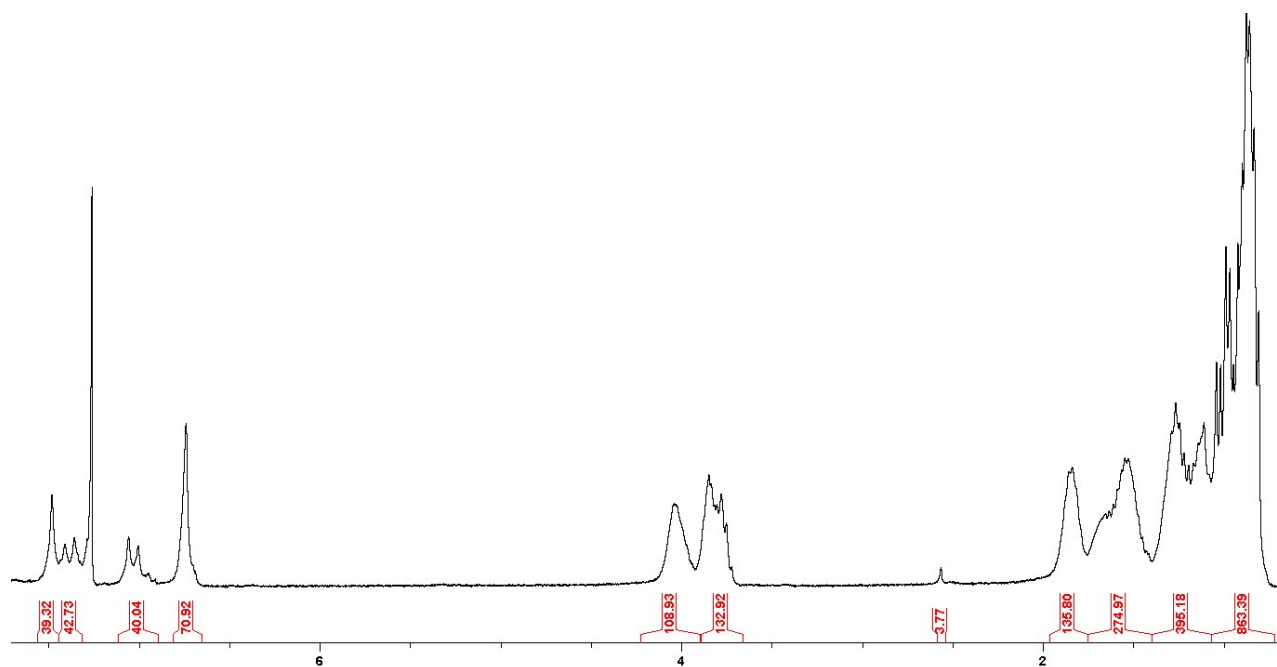

P12

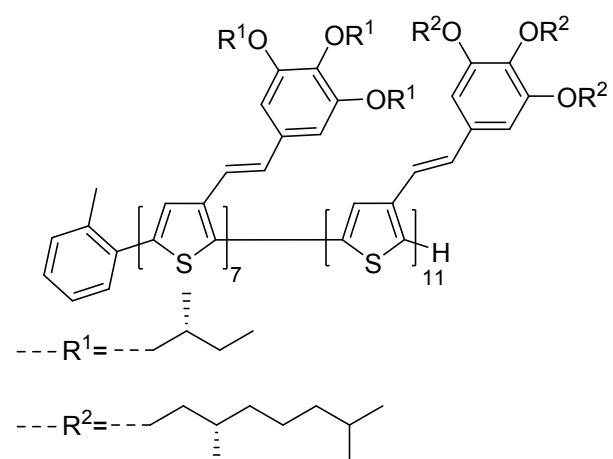

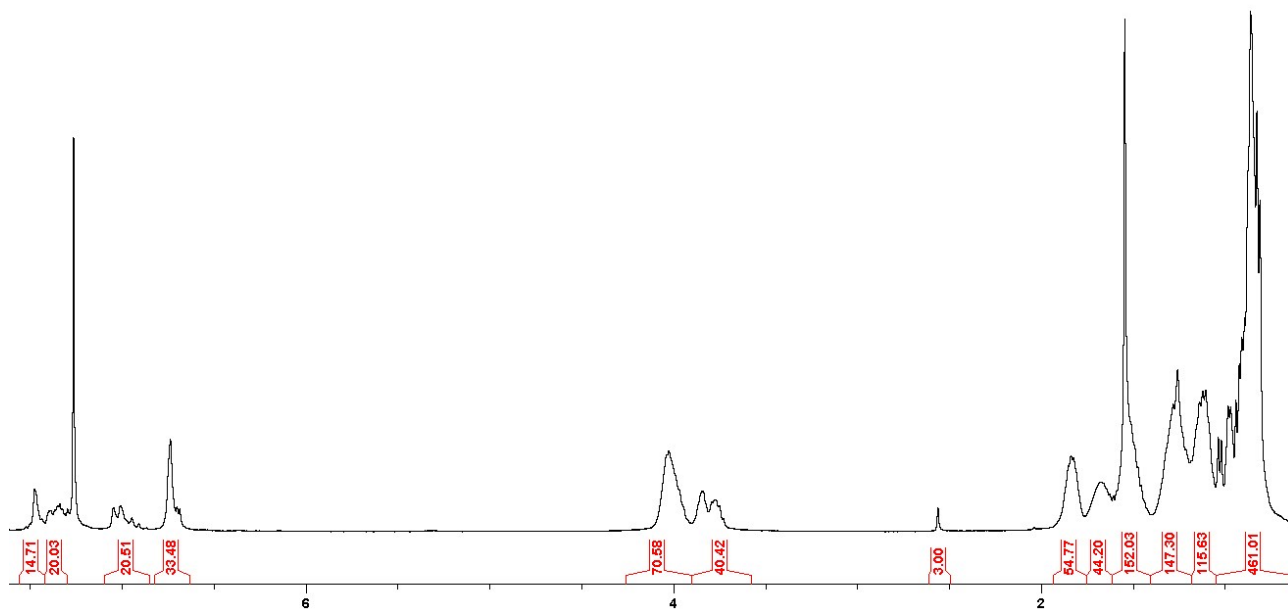

P13

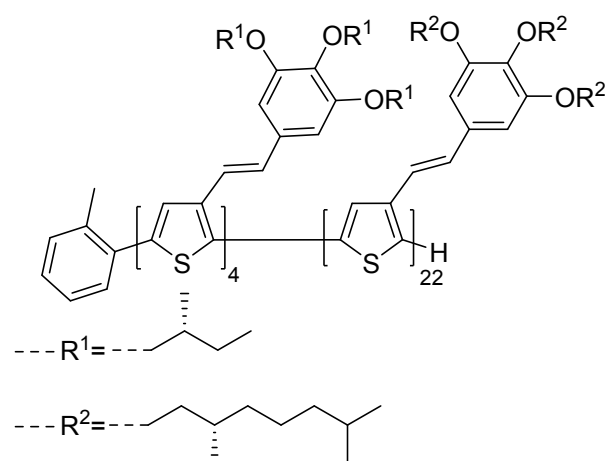

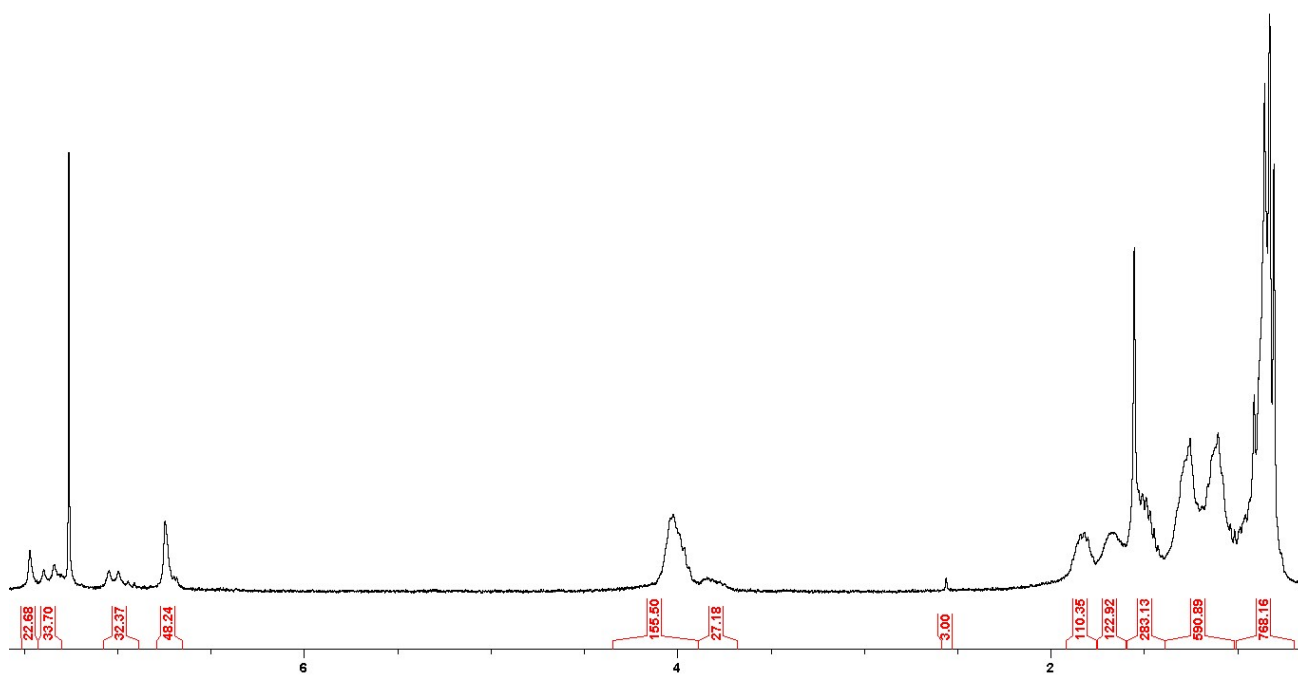

P14

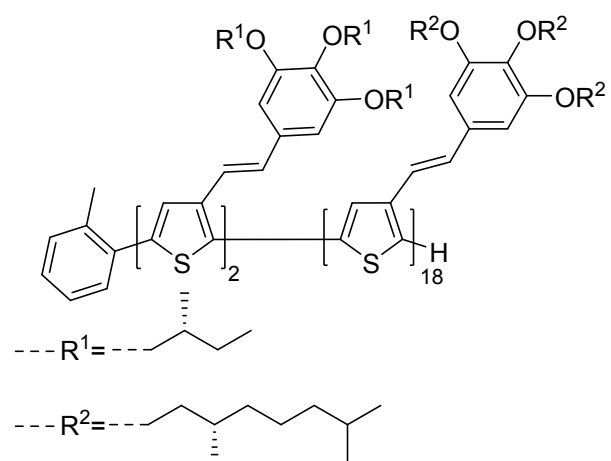



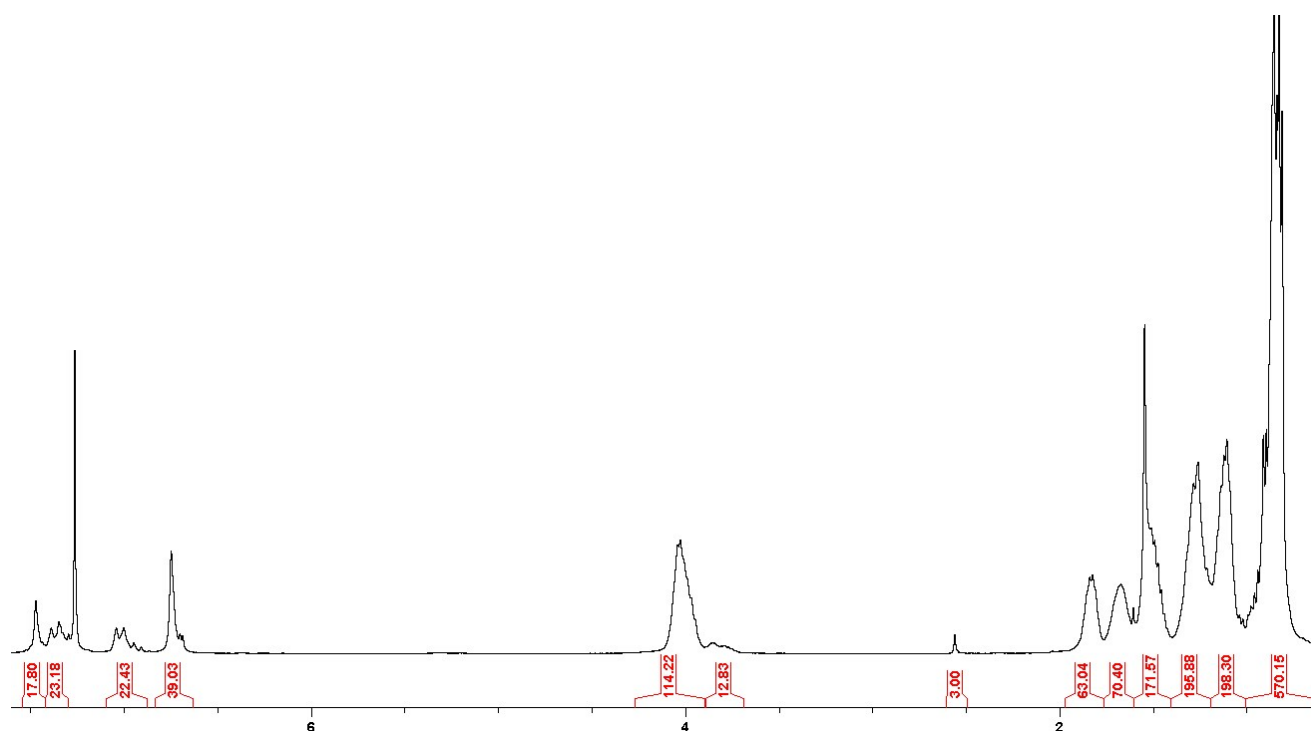

## References

- (1) Love, B. E.; Jones, E. G. The Use of Salicylaldehyde Phenylhydrazone as an Indicator for the Titration of Organometallic Reagents. *Journal of Organic Chemistry* **1999**, *64* (10), 3755–3756.
- (2) Long, J.; Liu, X.; Guo, H.; Zhao, B.; Tan, S. Effect of Conjugated Side Groups on the Photovoltaic Performances of Triphenylamine-Based Dyes Sensitized Solar Cells. *Dyes and Pigments* **2016**, *124*, 222–231.
- (3) Helmich, F.; Smulders, M. M. J.; Lee, C. C.; Schenning, A. P. H. J.; Meijer, E. W. Effect of Stereogenic Centers on the Self-Sorting, Depolymerization, and Atropisomerization Kinetics of Porphyrin-Based Aggregates. *Journal of the American Chemical Society* **2011**, *133* (31), 12238–12246.
- (4) Yorsaeng, S.; Kato, Y.; Tsutsumi, K.; Inagaki, A.; Kitiyanan, B.; Fujiki, M.; Nomura, K. Synthesis of Well-Defined Oligo(2,5-Dialkoxy-1,4-Phenylene Vinylene)s with Chiral End Groups: Unique Helical Aggregations Induced by the Chiral Chain Ends. *Chemistry - A European Journal* **2015**, *21* (47), 16764–16768.
- (5) Leysen, P.; Teyssandier, J.; De Feyter, S.; Koeckelberghs, G. Controlled Synthesis of a Helical Conjugated Polythiophene. *Macromolecules* **2018**, *51*, 3504–3514.
- (6) Verswyvel, M.; Monnaie, F.; Koeckelberghs, G. AB Block Copoly(3-Alkylthiophenes): Synthesis and Chiroptical Behavior. *Macromolecules* **2011**, *44* (24), 9489–9498.
